# Supplementary material for: Dimensional engineering in chiral layered hybrid perovskites for high-anisotropy self-powered circularly polarized light detection
Source: Royal Society of Chemistry journal article supplement (doi:10.1039/d6sc00286b), 2026-04-24
Supplement: d6sc00286b1.pdf [file d6sc00286b1.pdf]

## Supporting Information

### **Dimensional Engineering in Chiral Layered Hybrid Perovskites for High-Anisotropy Self-powered Circularly Polarized Light Detection**

*Wan Luo<sup>a,b</sup>, Qianxi Wang<sup>b</sup>, Xiaoqi Li<sup>b</sup>, Fen Zhang<sup>b</sup>, Yan Fu<sup>a,b</sup>, Yikun Fu<sup>a,b</sup>, Xiaoyu  
Zhang<sup>a,b</sup>, Guifu Zhang<sup>b</sup>, Xitao Liu<sup>a,b,c\*</sup> and Junhua Luo<sup>b,c</sup>*

<sup>a</sup>State Key Laboratory of Functional Crystals and Devices, Fujian Institute of Research on the Structure of Matter, Chinese Academy of Sciences Fuzhou, Fujian 350002, China.

<sup>b</sup>College of Chemistry and Materials Science, Fujian Normal University, Fuzhou, Fujian 350007, P.R. China University of Chinese Academy of Sciences, Beijing 100049, China.

<sup>c</sup>Fujian College, University of Chinese Academy of Sciences, Fuzhou, Fujian 350002, P.R. China.

## Table of Contents

|                                                                                                                                                                                                                                                                           |    |
|---------------------------------------------------------------------------------------------------------------------------------------------------------------------------------------------------------------------------------------------------------------------------|----|
| Table S1. Crystal data and structure refinement for $(R/S\text{-BrBA})_2\text{EA}_2\text{Pb}_3\text{Br}_{10}$ (3R/S). .....                                                                                                                                               | 4  |
| Table S2. Atomic coordinates ( $\times 10^4$ ) and equivalent isotropic displacement parameters ( $\text{\AA}^2 \times 10^3$ ) for 3R. $U(\text{eq})$ is defined as one third of the trace of the orthogonalized $U_{ij}$ tensor.....                                     | 6  |
| Table S3. Atomic coordinates ( $\times 10^4$ ) and equivalent isotropic displacement parameters ( $\text{\AA}^2 \times 10^3$ ) for 3S. $U(\text{eq})$ is defined as one third of the trace of the orthogonalized $U_{ij}$ tensor.....                                     | 8  |
| Table S4. Selected bond lengths ( $\text{\AA}$ ) for 3R. ....                                                                                                                                                                                                             | 10 |
| Table S5. Selected bond lengths ( $\text{\AA}$ ) for 3S.....                                                                                                                                                                                                              | 11 |
| Table S6. Selected bond angles ( $^\circ$ ) for 3R.....                                                                                                                                                                                                                   | 12 |
| Table S7. Selected bond angles ( $^\circ$ ) for 3S. ....                                                                                                                                                                                                                  | 14 |
| Table S8. Crystal data and structure refinement for $(R/S\text{-BrBA})_2\text{EAPb}_2\text{Br}_7$ (2R/S). ....                                                                                                                                                            | 16 |
| Table S9. Fractional Atomic Coordinates ( $\times 10^4$ ) and Equivalent Isotropic Displacement Parameters ( $\text{\AA}^2 \times 10^3$ ) for 2R. $U_{eq}$ is defined as 1/3 of the trace of the orthogonalised $U_{ij}$ tensor. ....                                     | 17 |
| Table S10. Fractional Atomic Coordinates ( $\times 10^4$ ) and Equivalent Isotropic Displacement Parameters ( $\text{\AA}^2 \times 10^3$ ) for 2S. $U_{eq}$ is defined as 1/3 of the trace of the orthogonalised $U_{ij}$ tensor. ....                                    | 18 |
| Table S11. Selected bond lengths ( $\text{\AA}$ ) for 2R. ....                                                                                                                                                                                                            | 19 |
| Table S12. Selected bond lengths ( $\text{\AA}$ ) for 2S.....                                                                                                                                                                                                             | 20 |
| Table S13. Selected bond angles ( $^\circ$ ) for 2R.....                                                                                                                                                                                                                  | 20 |
| Table S14. Selected bond angles ( $^\circ$ ) for 2S. ....                                                                                                                                                                                                                 | 21 |
| Table S15. Summary of the band gap and chiroptical properties (CD/gCD) of reported Compound.....                                                                                                                                                                          | 22 |
| Table S16. The asymmetry factor of various reported CPL detectors. ....                                                                                                                                                                                                   | 24 |
| Figure S1. Chiral multilayered structures of 3R/S viewed along the $a$ - axis, and the picture of crystal 3R. (Corresponding hydrogen atoms of organic cations are omitted for clarity.) .....                                                                            | 25 |
| Figure S2. The powder XRD patterns of 1R/S, 2R/S, and 3R/S.....                                                                                                                                                                                                           | 26 |
| Figure S3. Thermogravimetric analysis curves for 3R. ....                                                                                                                                                                                                                 | 26 |
| Figure S4. (a) Schematic diagram of the Br $\cdots$ Br bond and fingerprints expressing the strength of the Br $\cdots$ Br bond for 2R. (b) Schematic diagram of the Br $\cdots$ Br bond and fingerprints expressing the strength of the Br $\cdots$ Br bond for 3R. .... | 27 |

|                                                                                                                                                                                                                                                                                                                                    |    |
|------------------------------------------------------------------------------------------------------------------------------------------------------------------------------------------------------------------------------------------------------------------------------------------------------------------------------------|----|
| Figure S5. (a) The photo of the films for 1R/S, 2R/S and 3R/S; (b) The PXRD comparison diagram of the diaphragm of 1R/S, 2R/S and 3R/S and the theoretical simulation.....                                                                                                                                                         | 28 |
| Figure S6. $[\text{PbBr}_6]^{4-}$ octahedron for 2R and 3R. Using the formula $\Delta d_{2R}$ is 0.0017 and $\Delta d_{3R}$ is 0.0023....                                                                                                                                                                                          | 29 |
| Figure S7. (a) Length of the N-H...Br bond and fingerprints expressing the strength of the N-H...Br bond for 2R. (b) Length of the N-H...Br bond and fingerprints expressing the strength of the N-H...Br bond for 3R. ....                                                                                                        | 29 |
| Figure S8. Bandgap calculated via Tauc for 1R, 2R and 3R. ....                                                                                                                                                                                                                                                                     | 30 |
| Figure S9. Calculated electronic band structures (a) and partial DOS (b) of 1R. ....                                                                                                                                                                                                                                               | 30 |
| Figure S10. Calculated electronic band structures (a) and partial DOS (b) of 2R. ....                                                                                                                                                                                                                                              | 31 |
| Figure S11. Calculated electronic band structures (a) and partial DOS (b) of 3R. ....                                                                                                                                                                                                                                              | 31 |
| Figure S12. Absorption spectra (solid lines) and PL spectra (dashed lines) for 1R, 2R, and 3R. The PL spectra (dashed lines) are deconvoluted into multiple Gaussian components (filled colored areas) ....                                                                                                                        | 32 |
| Figure S13. The responsivity ( $R$ ) and detectivity ( $D^*$ ) of the 3R device. ....                                                                                                                                                                                                                                              | 32 |
| Figure S14. The XRD of 3R was measured on the fresh powder and after 30 days. ....                                                                                                                                                                                                                                                 | 33 |
| Figure S15. The I-V curves of 3R were measured on the fresh sample and after 30 days. ....                                                                                                                                                                                                                                         | 34 |
| Figure S16. The real-time-dependent reproducible photovoltage for 3R. ....                                                                                                                                                                                                                                                         | 34 |
| Figure S17. The intrinsic bulk photovoltaic effect measured along the $b$ -axis for 3R. ....                                                                                                                                                                                                                                       | 35 |
| Figure S18. The photos of the single-crystal sample and the device for the CPL detection. ....                                                                                                                                                                                                                                     | 36 |
| 1: Fiber output laser head (Thorlabs LP405-MF300,405 nm) 2: Optical lens 3: 405 nm fiber collimator (Thorlabs MPQ10ME-405) 4: Electric rotary stage (Thorlabs K10CR1/M) 5: Electrode box with built-in single-crystal electrode 6: Desktop laser diode driver/TEC controller (ITC40017) 7: Electrostatic meter (Model 6517B) ..... | 36 |
| References. ....                                                                                                                                                                                                                                                                                                                   | 37 |

**Table S1.** Crystal data and structure refinement for (R/S-BrBA)<sub>2</sub>EA<sub>2</sub>Pb<sub>3</sub>Br<sub>10</sub> (3R/S).

| Empirical formula                      | 3R                                                                               | 3S                                                                               |
|----------------------------------------|----------------------------------------------------------------------------------|----------------------------------------------------------------------------------|
| Formula weight                         | 1818.95                                                                          | 1780.90                                                                          |
| Temperature/K                          | 293(2)                                                                           | 100.00(11)                                                                       |
| Crystal system                         | monoclinic                                                                       | monoclinic                                                                       |
| Space group                            | <i>P</i> 2 <sub>1</sub>                                                          | <i>P</i> 2 <sub>1</sub>                                                          |
| <i>a</i> /Å                            | 8.3135(3)                                                                        | 8.30260(10)                                                                      |
| <i>b</i> /Å                            | 8.4847(2)                                                                        | 8.46770(10)                                                                      |
| <i>c</i> /Å                            | 52.847(2)                                                                        | 52.7342(9)                                                                       |
| $\alpha$ /°                            | 90                                                                               | 90                                                                               |
| $\beta$ /°                             | 90                                                                               | 90.071(2)                                                                        |
| $\gamma$ /°                            | 90                                                                               | 90                                                                               |
| Volume/Å <sup>3</sup>                  | 3727.7(2)                                                                        | 3707.42(9)                                                                       |
| <i>Z</i>                               | 4                                                                                | 4                                                                                |
| $\rho_{\text{calc}}$ g/cm <sup>3</sup> | 3.241                                                                            | 3.191                                                                            |
| $\mu$ /mm <sup>-1</sup>                | 26.391                                                                           | 26.532                                                                           |
| <i>F</i> (000)                         | 3216.0                                                                           | 3065.0                                                                           |
| Crystal size/mm <sup>3</sup>           | 0.3 × 0.2 × 0.1                                                                  | 0.3 × 0.2 × 0.1                                                                  |
| Radiation                              | Mo K $\alpha$ ( $\lambda$ = 0.71073)                                             | Mo K $\alpha$ ( $\lambda$ = 0.71073)                                             |
| 2 $\Theta$ range for data collection/° | 3.854 to 50.054                                                                  | 3.862 to 49.998                                                                  |
| Index ranges                           | -9 ≤ <i>h</i> ≤ 9,<br>-10 ≤ <i>k</i> ≤ 10,<br>-62 ≤ <i>l</i> ≤ 58                | -9 ≤ <i>h</i> ≤ 9,<br>-10 ≤ <i>k</i> ≤ 10,<br>-59 ≤ <i>l</i> ≤ 62                |
| Reflections collected                  | 33328                                                                            | 37739                                                                            |
| Independent reflections                | 12549 [ <i>R</i> <sub>int</sub> = 0.0833,<br><i>R</i> <sub>sigma</sub> = 0.0879] | 12912 [ <i>R</i> <sub>int</sub> = 0.0483,<br><i>R</i> <sub>sigma</sub> = 0.0541] |
| Data/restraints/parameters             | 12549/213/575                                                                    | 12912/420/575                                                                    |

|                                               |                                    |                                    |
|-----------------------------------------------|------------------------------------|------------------------------------|
| Goodness-of-fit on $F^2$                      | 1.063                              | 1.047                              |
| Final $R$ indexes [ $I \geq 2\sigma(I)$ ]     | $R_1 = 0.0818,$<br>$wR_2 = 0.1798$ | $R_1 = 0.0462,$<br>$wR_2 = 0.1099$ |
| Final $R$ indexes [all data]                  | $R_1 = 0.0961, wR_2 =$<br>0.1859   | $R_1 = 0.0581, wR_2 =$<br>0.1156   |
| Largest diff. peak/hole / e $\text{\AA}^{-3}$ | 4.68/-5.16                         | 2.82/-2.31                         |
| Flack parameter                               | 0.003(14)                          | 0.013(9)                           |
| CCDC number                                   | 2469041                            | 2469438                            |

---

**Table S2.** Atomic coordinates ( $\times 10^4$ ) and equivalent isotropic displacement parameters ( $\text{\AA}^2 \times 10^3$ ) for 3R.  $U(\text{eq})$  is defined as one third of the trace of the orthogonalized  $U_{ij}$  tensor.

| Atoms | $x$         | $y$        | $z$        | $U(\text{eq})$ |
|-------|-------------|------------|------------|----------------|
| Pb1   | 6225(2)     | 2900(2)    | 2503.8(3)  | 15.3(4)        |
| Pb2   | 11428(2)    | 7861(2)    | 1315.0(3)  | 11.9(4)        |
| Pb3   | 11335.3(19) | 7673(2)    | 3659.2(3)  | 11.7(4)        |
| Pb4   | 6431.1(19)  | 2678.8(19) | 3683.5(3)  | 10.1(4)        |
| Pb5   | 6341(2)     | 2861(2)    | 1338.7(3)  | 12.4(4)        |
| Br7   | 4373(6)     | 6037(6)    | 2503.1(10) | 19.3(11)       |
| Br8   | 3172(6)     | 707(6)     | 2494.2(9)  | 16.5(10)       |
| Br9   | 8165(6)     | -166(6)    | 2503.7(9)  | 15.6(10)       |
| Br10  | 9183(6)     | 4750(6)    | 3785.5(10) | 18.7(11)       |
| Br11  | 11406(8)    | 7923(8)    | 1937.4(10) | 35.7(15)       |
| Br12  | 9386(6)     | 4503(6)    | 2497.4(10) | 18.5(11)       |
| Br13  | 11570(7)    | 7952(8)    | 3058.0(12) | 37.6(14)       |
| Br14  | 6210(6)     | 1956(6)    | 4202.9(9)  | 17.9(11)       |
| Br15  | 9039(6)     | 5187(6)    | 1200.7(10) | 17.8(11)       |
| Br16  | 11217(7)    | 8581(6)    | 795.7(10)  | 22.5(12)       |
| Br17  | 10666(5)    | 8461(5)    | 4171.4(9)  | 13.3(10)       |
| Br18  | 14178(6)    | 5766(6)    | 1216.5(10) | 21.6(12)       |
| Br20  | 5673(6)     | 2084(6)    | 826.9(9)   | 15.3(10)       |
| Br24  | 13770(6)    | 10135(6)   | 3655.0(10) | 19.7(11)       |
| Br25  | 6400(9)     | 2627(8)    | 3062.0(10) | 36.2(15)       |
| Br27  | 13668(6)    | 10521(6)   | 1424.0(10) | 20.8(12)       |
| Br28  | 6558(8)     | 2589(9)    | 1941.6(13) | 40.8(15)       |
| Br29  | 14028(6)    | 5365(6)    | 3796.8(10) | 16.1(11)       |
| Pb6   | 11223(2)    | 7637(2)    | 2495.4(3)  | 14.8(4)        |
| Br1   | 8783(6)     | 408(6)     | 1340.0(10) | 20.1(12)       |
| Br4   | 8658(6)     | 18(6)      | 3574.7(10) | 18.8(11)       |
| Br2   | 5093(7)     | 9101(7)    | 4917.3(10) | 27.6(12)       |

|     |            |           |            |          |
|-----|------------|-----------|------------|----------|
| Br3 | 10090(7)   | 1437(7)   | 82.9(11)   | 32.3(13) |
| Br5 | 8940(7)    | 1381(10)  | 4850.7(11) | 44.3(17) |
| Br6 | 3949(8)    | 9144(11)  | 147.5(12)  | 53(2)    |
| C1  | 6230(60)   | 7760(60)  | 622(10)    | 24(11)   |
| C2  | 11270(50)  | 2770(50)  | 4386(8)    | 8(8)     |
| N3  | 11700(40)  | 2550(40)  | 917(7)     | 13(8)    |
| C6  | 6440(60)   | 7710(60)  | 4359(10)   | 24(11)   |
| C16 | 4050(50)   | 7720(50)  | 4675(8)    | 13(9)    |
| C19 | 11770(70)  | 4480(60)  | 4437(11)   | 26(12)   |
| C20 | 9050(60)   | 2860(60)  | 326(10)    | 28(11)   |
| C21 | 4590(60)   | 8010(60)  | 4391(10)   | 21(10)   |
| C23 | 9620(60)   | 2530(60)  | 606(10)    | 27(11)   |
| C26 | 6280(60)   | 8650(60)  | 151(10)    | 19(10)   |
| C31 | 11250(70)  | 1890(70)  | 4858(12)   | 33(13)   |
| C39 | 11950(50)  | 1710(50)  | 4582(9)    | 14(9)    |
| C57 | 6920(60)   | 8840(60)  | 417(11)    | 27(11)   |
| N5  | 6730(40)   | 8030(40)  | 4086(7)    | 10(8)    |
| N9  | 11900(50)  | 2350(50)  | 4124(8)    | 22(9)    |
| C12 | 11440(70)  | 2840(70)  | 623(11)    | 31(12)   |
| N37 | 6870(60)   | 8210(50)  | 873(9)     | 32(11)   |
| C44 | 7040(70)   | 6120(60)  | 4433(11)   | 29(13)   |
| C66 | 6710(60)   | 6110(60)  | 562(11)    | 25(12)   |
| C8  | 10280(70)  | 1860(60)  | 2992(11)   | 30(13)   |
| C17 | 10740(90)  | 3040(90)  | 3189(14)   | 66(19)   |
| C22 | 10460(50)  | 1870(40)  | 2010(8)    | 4(8)     |
| N1  | 12330(100) | 3470(110) | 1892(18)   | 100(30)  |
| N36 | 12270(100) | 3700(120) | 3119(19)   | 120(30)  |
| N15 | 5290(60)   | 8780(60)  | 2001(10)   | 35(12)   |
| C81 | 7090(120)  | 6560(90)  | 1870(20)   | 80(30)   |
| C97 | 6660(100)  | 8220(90)  | 1850(18)   | 90(20)   |
| N4  | 5470(50)   | 8670(40)  | 2998(8)    | 16(8)    |
| C40 | 5780(120)  | 7360(110) | 3186(18)   | 110(30)  |

|     |           |           |          |         |
|-----|-----------|-----------|----------|---------|
| C45 | 12050(60) | 4430(60)  | 562(11)  | 24(12)  |
| C89 | 7420(110) | 6910(120) | 3100(20) | 110(40) |
| C35 | 10750(90) | 3270(90)  | 1827(16) | 59(18)  |

**Table S3.** Atomic coordinates ( $\times 10^4$ ) and equivalent isotropic displacement parameters ( $\text{\AA}^2 \times 10^3$ ) for 3S.  $U(\text{eq})$  is defined as one third of the trace of the orthogonalized  $U_{ij}$  tensor.

| Atom | <i>x</i>    | <i>y</i> | <i>z</i>  | $U(\text{eq})$ |
|------|-------------|----------|-----------|----------------|
| Pb1  | 3571.3(11)  | -2433(5) | 1316.8(2) | 15.7(2)        |
| Pb2  | -1343.6(10) | 2566(5)  | 1339.9(2) | 15.9(2)        |
| Pb3  | -1231.4(11) | 2619(5)  | 2504.3(2) | 18.9(2)        |
| Pb4  | 3767.2(11)  | 7356(5)  | 2496.9(2) | 19.0(2)        |
| Pb5  | 3653.5(10)  | 7408(5)  | 3661.6(2) | 16.1(2)        |
| Pb6  | 8572.9(11)  | 12406(5) | 3684.2(2) | 15.8(2)        |
| Br1  | 5963(3)     | -5113(6) | 1203.1(5) | 23.7(6)        |
| Br2  | 826(3)      | -4517(6) | 1215.9(5) | 28.0(7)        |
| Br3  | 3790(4)     | -1715(6) | 797.5(5)  | 27.5(6)        |
| Br4  | 1339(3)     | 228(6)   | 1423.9(5) | 26.3(7)        |
| Br5  | -684(3)     | 1801(6)  | 827.2(5)  | 22.1(6)        |
| Br6  | -3772(3)    | 114(6)   | 1343.4(5) | 24.9(6)        |
| Br7  | -1561(4)    | 2297(7)  | 1941.1(5) | 43.2(9)        |
| Br8  | -3171(3)    | -451(6)  | 2503.9(5) | 20.6(6)        |
| Br9  | -1406(4)    | 2352(7)  | 3062.5(5) | 41.3(8)        |
| Br10 | -4382(3)    | 4221(6)  | 2500.3(5) | 21.3(6)        |
| Br11 | 617(3)      | 5750(6)  | 2500.9(5) | 21.2(6)        |
| Br12 | 3588(4)     | 7633(7)  | 1937.8(5) | 39.3(8)        |
| Br13 | 1826(3)     | 10415(6) | 2497.3(5) | 20.5(6)        |
| Br14 | 3438(4)     | 7683(7)  | 3060.0(5) | 43.1(9)        |
| Br15 | 4312(3)     | 8176(6)  | 4175.0(5) | 23.2(6)        |
| Br16 | 1223(3)     | 9864(6)  | 3658.7(5) | 25.2(6)        |
| Br17 | 6333(3)     | 9744(6)  | 3577.7(6) | 28.9(7)        |

| Atom | <i>z</i>  | <i>y</i> | <i>z</i>  | <i>U</i> (eq) |
|------|-----------|----------|-----------|---------------|
| Br18 | 8781(4)   | 11690(6) | 4203.1(5) | 30.5(7)       |
| Br19 | 5828(4)   | 14496(6) | 3784.0(5) | 29.5(7)       |
| Br20 | 10965(3)  | 15085(6) | 3797.8(5) | 24.2(6)       |
| Br21 | 1058(4)   | 8850(8)  | 148.7(7)  | 62.9(12)      |
| N1   | -1880(30) | 7970(20) | 867(2)    | 29(3)         |
| C1   | -1255(14) | 8400(20) | 156(2)    | 30(3)         |
| C2   | -1928(15) | 8565(17) | 415(2)    | 30(3)         |
| C3   | -1253(19) | 7454(16) | 615(2)    | 30(3)         |
| C16  | -1730(30) | 5757(14) | 566(3)    | 30(3)         |
| Br22 | 4903(4)   | 1144(6)  | 82.0(5)   | 39.3(8)       |
| N2   | 3300(19)  | 2240(20) | 918(2)    | 24(3)         |
| C20  | 5909(18)  | 2578(19) | 327(2)    | 25(3)         |
| C19  | 5360(15)  | 2250(20) | 590(2)    | 24(3)         |
| C5   | 3576(16)  | 2483(17) | 641(2)    | 24(3)         |
| C22  | 3010(20)  | 4114(19) | 564(3)    | 25(3)         |
| Br23 | -95(4)    | 8827(6)  | 4918.8(6) | 40.9(8)       |
| N3   | -1718(19) | 7760(20) | 4084(2)   | 25(3)         |
| C9   | 927(18)   | 7420(20) | 4673(2)   | 26(3)         |
| C10  | 363(16)   | 7740(20) | 4410(2)   | 26(3)         |
| C11  | -1421(16) | 7488(17) | 4361(2)   | 26(3)         |
| C12  | -1960(20) | 5840(19) | 4433(4)   | 26(3)         |
| Br24 | 6057(4)   | 1125(8)  | 4851.1(7) | 66.4(12)      |
| C4   | 3220(30)  | 4183(15) | 4442(4)   | 36(3)         |
| C13  | 3759(15)  | 1650(30) | 4849(3)   | 35(3)         |
| C14  | 3045(15)  | 1470(17) | 4592(2)   | 35(3)         |
| C15  | 3735(19)  | 2527(17) | 4386(2)   | 35(3)         |
| N16  | 3150(30)  | 2050(20) | 4125(2)   | 35(3)         |
| N5   | -330(30)  | 8510(30) | 2007(5)   | 63(6)         |
| C17  | -1700(30) | 7960(20) | 1849(6)   | 65(6)         |
| C18  | -1760(40) | 6270(20) | 1870(7)   | 65(6)         |

| Atom | <i>x</i>  | <i>y</i> | <i>z</i> | <i>U</i> (eq) |
|------|-----------|----------|----------|---------------|
| N6   | -440(30)  | 8430(30) | 2992(5)  | 50(5)         |
| C7   | 4610(30)  | 1530(30) | 2010(5)  | 41(4)         |
| C21  | 4160(20)  | 2870(30) | 1844(5)  | 43(4)         |
| N22  | 2510(20)  | 3250(30) | 1896(5)  | 45(4)         |
| C8   | 4670(30)  | 1480(30) | 2989(5)  | 61(6)         |
| C23  | 4200(30)  | 2730(40) | 3172(5)  | 62(6)         |
| N24  | 2540(20)  | 3090(30) | 3126(5)  | 63(6)         |
| C19A | -2400(40) | 6510(40) | 3096(6)  | 53(5)         |
| C20A | -770(40)  | 7030(40) | 3162(6)  | 52(5)         |

**Table S4.** Selected bond lengths (Å) for 3R.

| Atom-Atom            | Length(Å) | Atom-Atom            | Length(Å) |
|----------------------|-----------|----------------------|-----------|
| Pb1-Br7              | 3.075(5)  | Br9-Pb6 <sup>4</sup> | 3.153(5)  |
| Pb1-Br8              | 3.148(5)  | Br11-Pb6             | 2.963(6)  |
| Pb1-Br9              | 3.061(5)  | Br12-Pb6             | 3.067(5)  |
| Pb1-Br12             | 2.959(5)  | Br13-Pb6             | 2.999(6)  |
| Pb1-Br25             | 2.962(5)  | Br2-C16              | 1.94(4)   |
| Pb1-Br28             | 2.996(7)  | Br3-C20              | 1.96(6)   |
| Pb2-Br11             | 3.290(6)  | Br5-C31              | 1.97(6)   |
| Pb2-Br15             | 3.076(5)  | Br6-C26              | 1.98(5)   |
| Pb2-Br16             | 2.817(5)  | C1-C57               | 1.53(8)   |
| Pb2-Br18             | 2.942(5)  | C1-N37               | 1.48(7)   |
| Pb2-Br27             | 2.982(5)  | C1-C66               | 1.49(7)   |
| Pb2-Br11             | 3.086(5)  | C2-C19               | 1.53(7)   |
| Pb3-Br10             | 3.131(5)  | C2-C39               | 1.48(6)   |
| Pb3-Br13             | 3.192(7)  | C2-N9                | 1.52(6)   |
| Pb3-Br17             | 2.843(5)  | N3-C12               | 1.59(7)   |
| Pb3-Br24             | 2.909(5)  | C6-C21               | 1.57(7)   |
| Pb3-Br29             | 3.062(5)  | C6-N5                | 1.49(6)   |
| Pb3-Br4 <sup>1</sup> | 3.019(5)  | C6-C44               | 1.49(7)   |
| Pb4-Br10             | 2.934(5)  | C16-C21              | 1.59(7)   |
| Pb4-Br14             | 2.818(5)  | C20-C23              | 1.58(7)   |

|                       |          |         |          |
|-----------------------|----------|---------|----------|
| Pb4-Br24 <sup>2</sup> | 3.094(5) | C23-C12 | 1.54(7)  |
| Pb4-Br25              | 3.285(5) | C26-C57 | 1.51(7)  |
| Pb4-Br29 <sup>3</sup> | 3.089(5) | C31-C39 | 1.58(8)  |
| Pb4-Br4               | 2.976(5) | C12-C45 | 1.47(8)  |
| Pb5-Br15              | 3.075(5) | C8-C17  | 1.49(5)  |
| Pb5-Br18 <sup>3</sup> | 3.119(5) | C17-N36 | 1.44(5)  |
| Pb5-Br20              | 2.839(5) | C22-C35 | 1.55(9)  |
| Pb5-Br27 <sup>2</sup> | 3.015(5) | N1-C35  | 1.37(10) |
| Pb5-Br28              | 3.199(7) | N15-C97 | 1.47(5)  |
| Pb5-Br1               | 2.907(5) | C81-C97 | 1.46(5)  |
| Br7-Pb6 <sup>3</sup>  | 2.950(5) | N4-C40  | 1.51(3)  |
| Br8-Pb6 <sup>2</sup>  | 3.067(5) | C40-C89 | 1.49(3)  |

<sup>1</sup><sub>+X,1+Y,+Z</sub>; <sup>2</sup><sub>-1+X,-1+Y,+Z</sub>; <sup>3</sup><sub>-1+X,+Y,+Z</sub>; <sup>4</sup><sub>+X,-1+Y,+Z</sub>; <sup>5</sup><sub>1+X,+Y,+Z</sub>; <sup>6</sup><sub>1+X,1+Y,+Z</sub>

**Table S5.** Selected bond lengths (Å) for 3S.

| Atom-Atom             | Length (Å) | Atom-Atom | Length (Å) |
|-----------------------|------------|-----------|------------|
| Pb1-Br1               | 3.076(3)   | Pb6-Br18  | 2.808(3)   |
| Pb1-Br2               | 2.931(3)   | Pb6-Br19  | 2.934(3)   |
| Pb1-Br3               | 2.811(3)   | Pb6-Br20  | 3.074(3)   |
| Pb1-Br4               | 2.972(3)   | Br21-C1   | 1.959(11)  |
| Pb1-Br6 <sup>1</sup>  | 3.088(3)   | N1-C3     | 1.494(13)  |
| Pb1-Br12 <sup>2</sup> | 3.275(3)   | C1-C2     | 1.486(13)  |
| Pb2-Br1 <sup>3</sup>  | 3.062(3)   | C2-C3     | 1.519(14)  |
| Pb2-Br24              | 3.127(3)   | C3-C16    | 1.513(14)  |
| Pb2-Br4               | 3.012(3)   | Br22-C20  | 1.959(11)  |
| Pb2-Br5               | 2.834(3)   | N2-C5     | 1.494(13)  |
| Pb2-Br6               | 2.894(3)   | C20-C19   | 1.486(13)  |
| Pb2-Br7               | 3.184(3)   | C19-C5    | 1.519(14)  |
| Pb3-Br7               | 2.995(3)   | C5-C22    | 1.513(14)  |
| Pb3-Br8               | 3.057(3)   | Br23-C9   | 1.959(11)  |
| Pb3-Br9               | 2.956(3)   | N3-C11    | 1.494(13)  |
| Pb3-Br10              | 2.947(3)   | C9-C10    | 1.486(13)  |
| Pb3-Br11              | 3.063(3)   | C10-C11   | 1.519(14)  |
| Pb3-Br13 <sup>2</sup> | 3.151(3)   | C11-C12   | 1.513(14)  |

|                       |          |           |           |
|-----------------------|----------|-----------|-----------|
| Pb4-Br8 <sup>5</sup>  | 3.149(3) | Br24-C13  | 1.959(11) |
| Pb4-Br10 <sup>1</sup> | 3.067(3) | C4-C15    | 1.494(13) |
| Pb4-Br11              | 2.948(3) | C13-C14   | 1.486(13) |
| Pb4-Br12              | 2.961(3) | C14-C15   | 1.519(14) |
| Pb4-Br13              | 3.051(3) | C15-N16   | 1.514(14) |
| Pb4-Br14              | 2.995(3) | N5-C17    | 1.485(13) |
| Pb5-Br14              | 3.186(3) | C17-C18   | 1.433(13) |
| Pb5-Br15              | 2.837(3) | N6-C20A   | 1.508(18) |
| Pb5-Br16              | 2.898(3) | C7-C21    | 1.485(13) |
| Pb5-Br17              | 3.010(3) | C21-N22   | 1.433(13) |
| Pb5-Br19 <sup>2</sup> | 3.123(3) | C8-C23    | 1.485(13) |
| Pb5-Br20 <sup>6</sup> | 3.061(3) | C23-N24   | 1.433(13) |
| Pb6-Br16 <sup>1</sup> | 3.081(3) | C19A-C20A | 1.463(19) |
| Pb6-Br17              | 2.975(3) |           |           |

<sup>1</sup><sub>1+X,+Y,+Z</sub>; <sup>2</sup><sub>+X,-1+Y,+Z</sub>; <sup>3</sup><sub>-1+X,1+Y,+Z</sub>; <sup>4</sup><sub>+X,1+Y,+Z</sub>; <sup>5</sup><sub>1+X,1+Y,+Z</sub>; <sup>6</sup><sub>-1+X,-1+Y,+Z</sub>

**Table S6.** Selected bond angles (°) for *3R*.

| Atom-Atom-Atom | Angle(°)   | Atom-Atom-Atom                           | Angle(°)   |
|----------------|------------|------------------------------------------|------------|
| Br7-Pb1-Br8    | 96.21(14)  | Br20-Pb5-Br27 <sup>2</sup>               | 81.09(15)  |
| Br9-Pb1-Br7    | 178.26(16) | Br20-Pb5-Br28                            | 160.55(18) |
| Br9-Pb1-Br8    | 85.53(16)  | Br20-Pb5-Br1                             | 88.43(15)  |
| Br12-Pb1-Br7   | 92.69(17)  | Br27 <sup>2</sup> -Pb5-Br15              | 174.86(15) |
| Br12-Pb1-Br8   | 170.96(16) | Br27 <sup>2</sup> -Pb5-Br18 <sup>3</sup> | 97.26(15)  |
| Br12-Pb1-Br9   | 85.57(14)  | Br27 <sup>2</sup> -Pb5-Br28              | 81.08(16)  |
| Br12-Pb1-Br25  | 90.22(18)  | Br1-Pb5-Br15                             | 87.18(15)  |
| Br12-Pb1-Br28  | 86.96(17)  | Br1-Pb5-Br18 <sup>3</sup>                | 165.67(17) |
| Br25-Pb1-Br7   | 95.37(17)  | Br1-Pb5-Br27 <sup>2</sup>                | 92.45(17)  |
| Br25-Pb1-Br8   | 90.54(17)  | Br1-Pb5-Br28                             | 84.64(17)  |
| Br25-Pb1-Br9   | 84.71(16)  | Pb6 <sup>3</sup> -Br7-Pb1                | 147.4(2)   |
| Br25-Pb1-Br28  | 167.4(2)   | Pb6 <sup>2</sup> -Br8-Pb1                | 158.13(18) |
| Br28-Pb1-Br7   | 96.98(17)  | Pb1-Br9-Pb6 <sup>4</sup>                 | 158.01(18) |
| Br28-Pb1-Br8   | 90.36(17)  | Pb4-Br10-Pb3                             | 151.75(18) |
| Br28-Pb1-Br9   | 82.88(17)  | Pb6-Br11-Pb2                             | 173.8(2)   |
| Br15-Pb2-Br11  | 101.80(16) | Pb1-Br12-Pb6                             | 147.2(2)   |

|                            |            |                                        |            |
|----------------------------|------------|----------------------------------------|------------|
| Br15-Pb2-Br1 <sup>1</sup>  | 93.71(14)  | Pb6-Br13-Pb3                           | 167.0(2)   |
| Br16-Pb2-Br11              | 166.01(17) | Pb5-Br15-Pb2                           | 153.88(19) |
| Br16-Pb2-Br15              | 85.88(15)  | Pb2-Br18-Pb5 <sup>5</sup>              | 152.7(2)   |
| Br16-Pb2-Br18              | 90.41(16)  | Pb3-Br24-Pb4 <sup>6</sup>              | 176.4(2)   |
| Br16-Pb2-Br27              | 93.63(16)  | Pb1-Br25-Pb4                           | 174.2(2)   |
| Br16-Pb2-Br1 <sup>1</sup>  | 81.12(16)  | Pb2-Br27-Pb5 <sup>6</sup>              | 158.4(2)   |
| Br18-Pb2-Br11              | 100.98(17) | Pb1-Br28-Pb5                           | 167.4(3)   |
| Br18-Pb2-Br15              | 91.23(15)  | Pb3-Br29-Pb4 <sup>5</sup>              | 153.96(18) |
| Br18-Pb2-Br27              | 90.35(16)  | Br7 <sup>5</sup> -Pb6-Br8 <sup>6</sup> | 85.52(14)  |
| Br18-Pb2-Br1 <sup>1</sup>  | 169.85(17) | Br7 <sup>5</sup> -Pb6-Br9 <sup>1</sup> | 171.03(15) |
| Br27-Pb2-Br11              | 78.35(16)  | Br7 <sup>5</sup> -Pb6-Br11             | 90.33(18)  |
| Br27-Pb2-Br15              | 178.35(15) | Br7 <sup>5</sup> -Pb6-Br12             | 92.46(17)  |
| Br27-Pb2-Br1 <sup>1</sup>  | 84.65(16)  | Br7 <sup>5</sup> -Pb6-Br13             | 86.68(17)  |
| Br1 <sup>1</sup> -Pb2-Br11 | 86.68(17)  | Br8 <sup>6</sup> -Pb6-Br9 <sup>1</sup> | 85.66(16)  |
| Br10-Pb3-Br13              | 107.82(16) | Br11-Pb6-Br8 <sup>6</sup>              | 84.34(16)  |
| Br17-Pb3-Br10              | 82.61(14)  | Br11-Pb6-Br9 <sup>1</sup>              | 90.40(17)  |
| Br17-Pb3-Br13              | 160.40(17) | Br11-Pb6-Br12                          | 95.74(16)  |
| Br17-Pb3-Br24              | 88.54(15)  | Br11-Pb6-Br13                          | 167.0(2)   |
| Br17-Pb3-Br29              | 93.87(14)  | Br12-Pb6-Br8 <sup>6</sup>              | 177.98(15) |
| Br17-Pb3-Br4 <sup>1</sup>  | 80.88(14)  | Br12-Pb6-Br9 <sup>1</sup>              | 96.36(14)  |
| Br24-Pb3-Br10              | 165.55(15) | Br13-Pb6-Br8 <sup>6</sup>              | 82.85(16)  |
| Br24-Pb3-Br13              | 84.06(16)  | Br13-Pb6-Br9 <sup>1</sup>              | 90.63(16)  |
| Br24-Pb3-Br29              | 87.26(15)  | Br13-Pb6-Br12                          | 96.99(17)  |
| Br24-Pb3-Br4 <sup>1</sup>  | 92.22(17)  | Pb5-Br1-Pb2 <sup>4</sup>               | 177.1(2)   |
| Br29-Pb3-Br10              | 81.99(14)  | Pb4-Br4-Pb3 <sup>4</sup>               | 158.46(19) |
| Br29-Pb3-Br13              | 103.85(16) | N37-C1-C57                             | 110(4)     |
| Br4 <sup>1</sup> -Pb3-Br10 | 97.59(15)  | N37-C1-C66                             | 110(4)     |
| Br4 <sup>1</sup> -Pb3-Br13 | 81.31(16)  | C66-C1-C57                             | 108(5)     |
| Br4 <sup>1</sup> -Pb3-Br29 | 174.73(15) | C39-C2-C19                             | 111(4)     |
| Br10-Pb4-Br24 <sup>2</sup> | 169.71(15) | C39-C2-N9                              | 111(4)     |
| Br10-Pb4-Br25              | 101.41(17) | N9-C2-C19                              | 107(4)     |
| Br10-Pb4-Br29 <sup>3</sup> | 91.53(14)  | N5-C6-C21                              | 103(4)     |
| Br10-Pb4-Br4               | 90.28(15)  | N5-C6-C44                              | 111(5)     |
| Br14-Pb4-Br10              | 90.13(15)  | C44-C6-C21                             | 116(5)     |

|                                          |            |             |        |
|------------------------------------------|------------|-------------|--------|
| Br14-Pb4-Br24 <sup>2</sup>               | 81.32(15)  | C21-C16-Br2 | 114(3) |
| Br14-Pb4-Br25                            | 166.01(16) | C23-C20-Br3 | 112(4) |
| Br14-Pb4-Br29 <sup>3</sup>               | 85.96(15)  | C6-C21-C16  | 111(4) |
| Br14-Pb4-Br4                             | 93.66(15)  | C12-C23-C20 | 109(5) |
| Br24 <sup>2</sup> -Pb4-Br25              | 86.35(17)  | C57-C26-Br6 | 109(4) |
| Br29 <sup>3</sup> -Pb4-Br24 <sup>2</sup> | 93.55(14)  | C39-C31-Br5 | 108(3) |
| Br29 <sup>3</sup> -Pb4-Br25              | 101.45(15) | C2-C39-C31  | 117(4) |
| Br4-Pb4-Br24 <sup>2</sup>                | 84.61(16)  | C26-C57-C1  | 118(4) |
| Br4-Pb4-Br25                             | 78.55(15)  | C23-C12-N3  | 99(4)  |
| Br4-Pb4-Br29 <sup>3</sup>                | 178.15(15) | C45-C12-N3  | 108(4) |
| Br15-Pb5-Br18 <sup>3</sup>               | 82.20(15)  | C45-C12-C23 | 119(5) |
| Br15-Pb5-Br28                            | 103.98(16) | N36-C17-C8  | 108(7) |
| Br18 <sup>3</sup> -Pb5-Br28              | 107.21(17) | N15-C97-C81 | 118(7) |
| Br20-Pb5-Br15                            | 93.78(15)  | C89-C40-N4  | 98(4)  |
| Br20-Pb5-Br18 <sup>3</sup>               | 82.73(14)  | N1-C35-C22  | 95(6)  |

<sup>1</sup>+X,1+Y,+Z; <sup>2</sup>-1+X,-1+Y,+Z; <sup>3</sup>-1+X,+Y,+Z; <sup>4</sup>+X,-1+Y,+Z; <sup>5</sup>1+X,+Y,+Z; <sup>6</sup>1+X,1+Y,+Z

**Table S7.** Selected bond angles (°) for 3S.

| Atom-Atom-Atom            | Angle(°)   | Atom-Atom-Atom                           | Angle(°)  |
|---------------------------|------------|------------------------------------------|-----------|
| Br1-Pb1-Br6 <sup>1</sup>  | 93.61(8)   | Br15-Pb5-Br17                            | 81.25(8)  |
| Br1-Pb1-Br12 <sup>2</sup> | 101.85(9)  | Br15-Pb5-Br19 <sup>2</sup>               | 82.70(8)  |
| Br2-Pb1-Br1               | 91.28(9)   | Br15-Pb5-Br20 <sup>6</sup>               | 93.61(8)  |
| Br2-Pb1-Br4               | 90.33(9)   | Br16-Pb5-Br14                            | 84.50(9)  |
| Br2-Pb1-Br6 <sup>1</sup>  | 169.78(9)  | Br16-Pb5-Br17                            | 92.42(10) |
| Br2-Pb1-Br12 <sup>2</sup> | 101.19(9)  | Br16-Pb5-Br19 <sup>2</sup>               | 165.96(9) |
| Br3-Pb1-Br1               | 85.83(8)   | Br16-Pb5-Br20 <sup>6</sup>               | 87.38(8)  |
| Br3-Pb1-Br2               | 90.26(9)   | Br17-Pb5-Br14                            | 81.16(9)  |
| Br3-Pb1-Br4               | 93.57(9)   | Br17-Pb5-Br19 <sup>2</sup>               | 97.01(9)  |
| Br3-Pb1-Br6 <sup>1</sup>  | 81.16(8)   | Br17-Pb5-Br20 <sup>6</sup>               | 174.87(8) |
| Br3-Pb1-Br12 <sup>2</sup> | 165.96(10) | Br19 <sup>2</sup> -Pb5-Br14              | 107.18(9) |
| Br4-Pb1-Br1               | 178.28(9)  | Br20 <sup>6</sup> -Pb5-Br14              | 103.92(9) |
| Br4-Pb1-Br6 <sup>1</sup>  | 84.70(9)   | Br20 <sup>6</sup> -Pb5-Br19 <sup>2</sup> | 82.29(8)  |
| Br4-Pb1-Br12 <sup>2</sup> | 78.41(9)   | Br17-Pb6-Br16 <sup>1</sup>               | 84.77(9)  |

|                                         |            |                            |            |
|-----------------------------------------|------------|----------------------------|------------|
| Br6 <sup>1</sup> -Pb1-Br12 <sup>2</sup> | 86.59(9)   | Br17-Pb6-Br20              | 178.33(9)  |
| Br13-Pb2-Br2 <sup>4</sup>               | 82.21(8)   | Br18-Pb6-Br16 <sup>1</sup> | 81.30(9)   |
| Br1 <sup>3</sup> -Pb2-Br7               | 103.79(9)  | Br18-Pb6-Br17              | 93.34(9)   |
| Br2 <sup>4</sup> -Pb2-Br7               | 107.35(9)  | Br18-Pb6-Br19              | 90.13(9)   |
| Br4-Pb2-Br1 <sup>3</sup>                | 174.82(8)  | Br18-Pb6-Br20              | 86.00(9)   |
| Br4-Pb2-Br2 <sup>4</sup>                | 97.13(8)   | Br19-Pb6-Br16 <sup>1</sup> | 169.84(9)  |
| Br4-Pb2-Br7                             | 81.33(9)   | Br19-Pb6-Br17              | 90.31(9)   |
| Br5-Pb2-Br1 <sup>3</sup>                | 93.65(8)   | Br19-Pb6-Br20              | 91.23(9)   |
| Br5-Pb2-Br2 <sup>4</sup>                | 82.47(8)   | Br20-Pb6-Br16 <sup>1</sup> | 93.61(8)   |
| Br5-Pb2-Br4                             | 81.17(8)   | Pb2 <sup>7</sup> -Br1-Pb1  | 154.04(10) |
| Br5-Pb2-Br6                             | 88.72(8)   | Pb1-Br2-Pb2 <sup>2</sup>   | 152.35(11) |
| Br5-Pb2-Br7                             | 160.87(10) | Pb1-Br4-Pb2                | 158.66(11) |
| Br6-Pb2-Br1 <sup>3</sup>                | 87.33(8)   | Pb2-Br6-Pb1 <sup>8</sup>   | 176.67(12) |
| Br6-Pb2-Br2 <sup>4</sup>                | 165.83(9)  | Pb3-Br7-Pb2                | 167.38(15) |
| Br6-Pb2-Br4                             | 92.43(9)   | Pb3-Br8-Pb4 <sup>6</sup>   | 157.93(10) |
| Br6-Pb2-Br7                             | 84.37(9)   | Pb3-Br9-Pb6 <sup>6</sup>   | 174.26(14) |
| Br7-Pb3-Br8                             | 82.80(10)  | Pb3-Br10-Pb4 <sup>8</sup>  | 147.49(11) |
| Br7-Pb3-Br11                            | 96.78(10)  | Pb4-Br11-Pb3               | 147.53(11) |
| Br7-Pb3-Br13 <sup>2</sup>               | 90.40(9)   | Pb4-Br13-Pb3 <sup>4</sup>  | 158.19(10) |
| Br8-Pb3-Br11                            | 178.24(8)  | Pb4-Br14-Pb5               | 167.28(15) |
| Br8-Pb3-Br13 <sup>2</sup>               | 85.47(9)   | Pb5-Br16-Pb6 <sup>8</sup>  | 176.81(11) |
| Br9-Pb3-Br7                             | 167.46(12) | Pb6-Br17-Pb5               | 158.77(12) |
| Br9-Pb3-Br8                             | 84.80(9)   | Pb6-Br19-Pb5 <sup>4</sup>  | 152.66(11) |
| Br9-Pb3-Br11                            | 95.57(9)   | Pb5 <sup>5</sup> -Br20-Pb6 | 154.11(10) |
| Br9-Pb3-Br13 <sup>2</sup>               | 90.41(9)   | C2-C1-Br21                 | 111.6(8)   |
| Br10-Pb3-Br7                            | 87.41(9)   | C1-C2-C3                   | 116.1(8)   |
| Br10-Pb3-Br8                            | 85.64(8)   | N1-C3-C2                   | 107.8(8)   |
| Br10-Pb3-Br9                            | 89.87(9)   | N1-C3-C16                  | 109.8(9)   |
| Br10-Pb3-Br11                           | 92.64(9)   | C16-C3-C2                  | 111.9(9)   |
| Br10-Pb3-Br13 <sup>2</sup>              | 171.04(9)  | C19-C20-Br22               | 111.6(8)   |
| Br11-Pb3-Br13 <sup>2</sup>              | 96.25(7)   | C20-C19-C5                 | 116.1(8)   |
| Br10 <sup>1</sup> -Pb4-Br8 <sup>5</sup> | 96.09(7)   | N2-C5-C19                  | 107.8(8)   |
| Br11-Pb4-Br8 <sup>5</sup>               | 171.25(9)  | N2-C5-C22                  | 109.8(9)   |
| Br11-Pb4-Br10 <sup>1</sup>              | 92.59(9)   | C22-C5-C19                 | 111.9(9)   |

|                            |            |              |           |
|----------------------------|------------|--------------|-----------|
| Br11-Pb4-Br12              | 90.02(9)   | C10-C9-Br23  | 111.6(8)  |
| Br11-Pb4-Br13              | 85.59(8)   | C9-C10-C11   | 116.1(8)  |
| Br11-Pb4-Br14              | 87.34(9)   | N3-C11-C10   | 107.8(8)  |
| Br12-Pb4-Br8 <sup>5</sup>  | 90.26(9)   | N3-C11-C12   | 109.8(9)  |
| Br12-Pb4-Br10 <sup>1</sup> | 95.67(9)   | C12-C11-C10  | 111.9(9)  |
| Br12-Pb4-Br13              | 84.70(9)   | C14-C13-Br24 | 111.6(8)  |
| Br12-Pb4-Br14              | 167.23(12) | C13-C14-C15  | 116.1(8)  |
| Br13-Pb4-Br8 <sup>5</sup>  | 85.73(9)   | C4-C15-C14   | 107.8(8)  |
| Br13-Pb4-Br10 <sup>1</sup> | 178.15(8)  | C4-C15-N16   | 109.8(9)  |
| Br14-Pb4-Br8 <sup>5</sup>  | 90.48(9)   | N16-C15-C14  | 111.9(9)  |
| Br14-Pb4-Br10 <sup>1</sup> | 96.92(10)  | C18-C17-N5   | 107.2(13) |
| Br14-Pb4-Br13              | 82.65(10)  | N22-C21-C7   | 107.2(13) |
| Br15-Pb5-Br14              | 160.75(11) | N24-C23-C8   | 107.2(13) |
| Br15-Pb5-Br16              | 88.50(8)   | C19A-C20A-N6 | 105(2)    |

<sup>1</sup><sub>1+X,+Y,+Z</sub>; <sup>2</sup><sub>+X,-1+Y,+Z</sub>; <sup>3</sup><sub>-1+X,1+Y,+Z</sub>; <sup>4</sup><sub>+X,1+Y,+Z</sub>; <sup>5</sup><sub>1+X,1+Y,+Z</sub>; <sup>6</sup><sub>-1+X,-1+Y,+Z</sub>; <sup>7</sup><sub>1+X,-1+Y,+Z</sub>; <sup>8</sup><sub>-1+X,+Y,+Z</sub>

**Table S8.** Crystal data and structure refinement for (*R/S*-BrBA)<sub>2</sub>EAPb<sub>2</sub>Br<sub>7</sub> (*2R/S*).

| Empirical formula                      | <i>2R</i>                                             | <i>2S</i>                                             |
|----------------------------------------|-------------------------------------------------------|-------------------------------------------------------|
| Formula weight                         | 1325.94                                               | 1325.94                                               |
| Temperature/K                          | 100.15                                                | 293(2)                                                |
| Crystal system                         | orthorhombic                                          | orthorhombic                                          |
| Space group                            | <i>P</i> 2 <sub>1</sub> 2 <sub>1</sub> 2 <sub>1</sub> | <i>P</i> 2 <sub>1</sub> 2 <sub>1</sub> 2 <sub>1</sub> |
| <i>a</i> /Å                            | 8.1959(2)                                             | 8.40870(10)                                           |
| <i>b</i> /Å                            | 8.6590(2)                                             | 8.59910(10)                                           |
| <i>c</i> /Å                            | 40.5557(10)                                           | 40.7961(3)                                            |
| $\alpha$ /°                            | 90                                                    | 90                                                    |
| $\beta$ /°                             | 90                                                    | 90                                                    |
| $\gamma$ /°                            | 90                                                    | 90                                                    |
| Volume/Å <sup>3</sup>                  | 2878.17(12)                                           | 2949.85(5)                                            |
| <i>Z</i>                               | 4                                                     | 4                                                     |
| $\rho_{\text{calc}}$ g/cm <sup>3</sup> | 3.060                                                 | 2.986                                                 |
| $\mu$ /mm <sup>-1</sup>                | 24.830                                                | 36.237                                                |
| <i>F</i> (000)                         | 2360.0                                                | 2360.0                                                |

|                                             |                                                                  |                                                                  |
|---------------------------------------------|------------------------------------------------------------------|------------------------------------------------------------------|
| Crystal size/mm <sup>3</sup>                | 0.3 × 0.2 × 0.1                                                  | 0.3 × 0.2 × 0.1                                                  |
| Radiation                                   | Ga Kα (λ = 1.3405)                                               | Cu Kα (λ = 1.54184)                                              |
| 2θ range for data collection/°              | 3.788 to 112.13                                                  | 4.332 to 133.176                                                 |
| Index ranges                                | -10 ≤ h ≤ 10,<br>-10 ≤ k ≤ 10,<br>-49 ≤ l ≤ 49                   | -10 ≤ h ≤ 10,<br>-10 ≤ k ≤ 8,<br>-48 ≤ l ≤ 48                    |
| Reflections collected                       | 102640                                                           | 53371                                                            |
| Independent reflections                     | 5537 [R <sub>int</sub> = 0.0946,<br>R <sub>sigma</sub> = 0.0271] | 5207 [R <sub>int</sub> = 0.1110,<br>R <sub>sigma</sub> = 0.0374] |
| Data/restraints/parameters                  | 5537/0/223                                                       | 5207/38/223                                                      |
| Goodness-of-fit on F <sup>2</sup>           | 1.121                                                            | 1.039                                                            |
| Final R indexes [I ≥ 2σ (I)]                | R <sub>1</sub> = 0.0318,<br>wR <sub>2</sub> = 0.0811             | R <sub>1</sub> = 0.0501,<br>wR <sub>2</sub> = 0.1477             |
| Final R indexes [all data]                  | R <sub>1</sub> = 0.0324,<br>wR <sub>2</sub> = 0.0822             | R <sub>1</sub> = 0.0525,<br>wR <sub>2</sub> = 0.1510             |
| Largest diff. peak/hole / e Å <sup>-3</sup> | 2.09/-3.63                                                       | 2.34/-2.00                                                       |
| Flack parameter                             | -0.001(4)                                                        | -0.036(7)                                                        |
| CCDC number                                 | 2520919                                                          | 2520920                                                          |

**Table S9.** Fractional Atomic Coordinates (× 10<sup>4</sup>) and Equivalent Isotropic Displacement Parameters (Å<sup>2</sup> × 10<sup>3</sup>) for 2R.  $U_{eq}$  is defined as 1/3 of the trace of the orthogonalised  $U_{ij}$  tensor.

| Atom | x          | y           | z         | U(eq)    |
|------|------------|-------------|-----------|----------|
| Pb01 | 7214.5(5)  | 10777.2(5)  | 6756.4(2) | 9.78(12) |
| Pb02 | 2234.2(5)  | 5827.1(5)   | 6719.0(2) | 8.95(12) |
| Br03 | 1922.9(14) | 6457.8(15)  | 6000.9(3) | 13.1(2)  |
| Br04 | 7880.7(15) | 10464.9(15) | 6079.0(3) | 14.6(2)  |
| Br05 | 119.3(14)  | 8542.4(15)  | 6825.7(3) | 14.2(3)  |
| Br06 | 5097.9(15) | 8032.0(15)  | 6675.8(3) | 16.5(3)  |
| Br07 | 4176.9(14) | 12685.3(15) | 6675.3(3) | 16.1(3)  |
| Br08 | 2282.4(16) | 5535.5(16)  | 7459.5(3) | 15.1(3)  |
| Br09 | -629.0(15) | 3703.8(16)  | 6699.4(3) | 18.6(3)  |

| Atom | <i>x</i>   | <i>y</i>  | <i>z</i>  | <i>U</i> (eq) |
|------|------------|-----------|-----------|---------------|
| Br0A | 6343.2(18) | 7464(2)   | 4877.9(3) | 27.7(3)       |
| Br0B | -263(2)    | 12318(2)  | 5215.5(4) | 44.2(5)       |
| N00C | 7888(13)   | 6607(13)  | 6140(2)   | 17(2)         |
| N00D | 1581(14)   | 1813(13)  | 7347(3)   | 21(2)         |
| C00E | 3783(15)   | 10336(16) | 5669(3)   | 21(3)         |
| N00F | 2027(12)   | 10252(13) | 6157(2)   | 16(2)         |
| C00G | 5824(16)   | 6488(17)  | 5297(3)   | 21(3)         |
| C00H | 3220(17)   | -415(16)  | 7542(3)   | 21(3)         |
| C00I | 7125(15)   | 6811(15)  | 5551(3)   | 18(3)         |
| C00J | 2125(14)   | 10781(14) | 5804(3)   | 14(2)         |
| C00K | 6643(15)   | 6099(15)  | 5886(3)   | 15(2)         |
| C00L | 1743(15)   | 12498(15) | 5795(3)   | 18(3)         |
| C00M | 1640(20)   | 13150(19) | 5452(3)   | 32(4)         |
| C1   | 2900(16)   | 1290(15)  | 7582(3)   | 18(3)         |
| C2   | 6541(18)   | 4374(16)  | 5888(3)   | 25(3)         |

**Table S10.** Fractional Atomic Coordinates ( $\times 10^4$ ) and Equivalent Isotropic Displacement Parameters ( $\text{\AA}^2 \times 10^3$ ) for 2S.  $U_{eq}$  is defined as 1/3 of the trace of the orthogonalised  $U_{ij}$  tensor.

| <i>Atom</i> | <i>x</i>   | <i>y</i>  | <i>z</i>  | <i>U</i> (eq) |
|-------------|------------|-----------|-----------|---------------|
| Pb01        | 2601.9(8)  | 9177.8(7) | 3275.4(2) | 36.0(2)       |
| Pb02        | -2366.2(8) | 4212.8(8) | 3257.0(2) | 38.6(2)       |
| Br03        | 3027(3)    | 8517(2)   | 3973.9(5) | 62.7(6)       |
| Br04        | 4866(3)    | 6498(3)   | 3171.9(6) | 62.8(6)       |
| Br05        | -3038(3)   | 4606(3)   | 3928.1(5) | 64.2(6)       |
| Br06        | 5268(3)    | 11488(3)  | 3314.4(8) | 70.2(7)       |
| Br07        | 2705(4)    | 9453(3)   | 2529.4(5) | 72.0(7)       |
| Br08        | 471(3)     | 2067(3)   | 3371.8(8) | 79.8(8)       |

| <i>Atom</i> | <i>x</i>  | <i>y</i>  | <i>z</i>   | <i>U(eq)</i> |
|-------------|-----------|-----------|------------|--------------|
| Br09        | -166(3)   | 6909(3)   | 3321.1(8)  | 73.5(8)      |
| Br00        | 4734(7)   | 2837(7)   | 4818.6(10) | 160(2)       |
| Br1         | -2112(13) | 7089(10)  | 5044(2)    | 280(6)       |
| N00C        | 2890(20)  | 4660(20)  | 3825(4)    | 58(4)        |
| N00D        | -2900(30) | 8580(30)  | 3858(5)    | 86(7)        |
| C00E        | 3050(30)  | 2540(20)  | 4215(5)    | 65(6)        |
| C00F        | 3100(40)  | 1910(30)  | 4555(6)    | 95(9)        |
| C00G        | -1860(50) | 8950(40)  | 4141(8)    | 130(9)       |
| C14         | 2740(30)  | 4260(20)  | 4182(5)    | 54(5)        |
| C22         | 1080(30)  | 4690(30)  | 4298(7)    | 77(7)        |
| C24         | -1800(60) | 10670(40) | 4169(10)   | 141(12)      |
| C2          | -2610(50) | 8280(60)  | 4449(9)    | 147(9)       |
| C1          | -1390(50) | 8510(50)  | 4714(9)    | 161(11)      |
| N1          | 3480(30)  | 13290(30) | 2614(8)    | 103(9)       |
| C3          | 1910(60)  | 15420(50) | 2448(12)   | 170(20)      |
| C4          | 1880(40)  | 13720(50) | 2492(14)   | 180(20)      |

**Table S11.** Selected bond lengths (Å) for 2R.

| Atom-Atom              | Length (Å) | Atom-Atom | Length (Å) |
|------------------------|------------|-----------|------------|
| Pb01-Br04              | 2.8140(12) | Br0A-C00G | 1.945(12)  |
| Pb01-Br05 <sup>1</sup> | 3.0808(12) | Br0B-C00M | 1.968(16)  |
| Pb01-Br06              | 2.9609(13) | N00C-C00K | 1.514(15)  |
| Pb01-Br07              | 3.0059(12) | N00D-C1   | 1.509(16)  |
| Pb01-Br08 <sup>2</sup> | 3.2135(12) | C00E-C00J | 1.514(16)  |
| Pb01-Br09 <sup>3</sup> | 3.0982(13) | N00F-C00J | 1.504(14)  |
| Pb02-Br03              | 2.9741(12) | C00G-C00I | 1.510(17)  |
| Pb02-Br05              | 2.9530(13) | C00H-C1   | 1.508(18)  |
| Pb02-Br06              | 3.0306(13) | C00I-C00K | 1.543(16)  |
| Pb02-Br07 <sup>4</sup> | 3.1571(13) | C00J-C00L | 1.519(17)  |

|           |            |           |           |
|-----------|------------|-----------|-----------|
| Pb02-Br08 | 3.0142(12) | C00K-C2   | 1.496(18) |
| Pb02-Br09 | 2.9822(13) | C00L-C00M | 1.504(17) |

<sup>1</sup><sub>1+X,+Y,+Z</sub>; <sup>2</sup><sub>1-X,1/2+Y,3/2-Z</sub>; <sup>3</sup><sub>1+X,1+Y,+Z</sub>; <sup>4</sup><sub>+X,-1+Y,+Z</sub>

**Table S12.** Selected bond lengths (Å) for 2S.

| Atom-Atom              | Length (Å) | Atom-Atom              | Length (Å) |
|------------------------|------------|------------------------|------------|
| Pb01-Br03              | 2.928(2)   | Br07-Pb02 <sup>7</sup> | 3.228(2)   |
| Pb01-Br04              | 3.019(2)   | Br08-Pb01 <sup>8</sup> | 3.089(2)   |
| Pb01-Br06              | 3.000(2)   | Br00-C00F              | 1.92(3)    |
| Pb01-Br07              | 3.054(2)   | Br1-C1                 | 1.92(2)    |
| Pb01-Br08 <sup>1</sup> | 3.089(2)   | N00C-C14               | 1.50(2)    |
| Pb01-Br09              | 3.043(2)   | N00D-C00G              | 1.48(2)    |
| Pb02-Br04 <sup>2</sup> | 3.066(2)   | C00E-C00F              | 1.49(3)    |
| Pb02-Br05              | 2.816(2)   | C00E-C14               | 1.51(3)    |
| Pb02-Br06 <sup>3</sup> | 3.083(2)   | C00G-C24               | 1.48(2)    |
| Pb02-Br07 <sup>4</sup> | 3.228(2)   | C00G-C2                | 1.52(2)    |
| Pb02-Br08              | 3.052(2)   | C14-C22                | 1.52(3)    |
| Pb02-Br09              | 2.977(2)   | C2-C1                  | 1.50(2)    |
| Br04-Pb02 <sup>5</sup> | 3.066(2)   | N1-C4                  | 1.48(3)    |
| Br06-Pb02 <sup>6</sup> | 3.083(2)   | C3-C4                  | 1.468(19)  |

<sup>1</sup><sub>+X,1+Y,+Z</sub>; <sup>2</sup><sub>-1+X,+Y,+Z</sub>; <sup>3</sup><sub>-1+X,-1+Y,+Z</sub>; <sup>4</sup><sub>-X,-1/2+Y,1/2-Z</sub>; <sup>5</sup><sub>1+X,+Y,+Z</sub>; <sup>6</sup><sub>1+X,1+Y,+Z</sub>; <sup>7</sup><sub>-X,1/2+Y,1/2-Z</sub>; <sup>8</sup><sub>+X,-1+Y,+Z</sub>

**Table S13.** Selected bond angles (°) for 2R.

| Atom-Atom-Atom                            | Angle (°) | Atom-Atom-Atom              | Angle (°) |
|-------------------------------------------|-----------|-----------------------------|-----------|
| Br04-Pb01-Br05 <sup>1</sup>               | 83.04(4)  | Br05-Pb02-Br09              | 91.88(4)  |
| Br04-Pb01-Br06                            | 85.91(4)  | Br06-Pb02-Br07 <sup>4</sup> | 98.57(4)  |
| Br04-Pb01-Br07                            | 96.13(4)  | Br08-Pb02-Br06              | 95.75(4)  |
| Br04-Pb01-Br08 <sup>2</sup>               | 159.22(4) | Br08-Pb02-Br07 <sup>4</sup> | 88.69(4)  |
| Br04-Pb01-Br09 <sup>3</sup>               | 83.98(4)  | Br09-Pb02-Br06              | 175.05(4) |
| Br05 <sup>1</sup> -Pb01-Br08 <sup>2</sup> | 76.68(3)  | Br09-Pb02-Br07 <sup>4</sup> | 82.19(4)  |
| Br05 <sup>1</sup> -Pb01-Br09 <sup>3</sup> | 94.57(4)  | Br09-Pb02-Br08              | 89.15(4)  |
| Br06-Pb01-Br05 <sup>1</sup>               | 87.63(4)  | Pb02-Br05-Pb01 <sup>5</sup> | 160.11(5) |
| Br06-Pb01-Br07                            | 86.79(4)  | Pb01-Br06-Pb02              | 162.39(5) |
| Br06-Pb01-Br08 <sup>2</sup>               | 97.59(4)  | Pb01-Br07-Pb02 <sup>6</sup> | 152.28(5) |

|                                           |           |                             |           |
|-------------------------------------------|-----------|-----------------------------|-----------|
| Br06-Pb01-Br09 <sup>3</sup>               | 169.31(4) | Pb02-Br08-Pb01 <sup>7</sup> | 169.19(5) |
| Br07-Pb01-Br05 <sup>1</sup>               | 174.40(4) | Pb02-Br09-Pb01 <sup>8</sup> | 162.02(5) |
| Br07-Pb01-Br08 <sup>2</sup>               | 104.49(4) | C00I-C00G-Br0A              | 111.2(9)  |
| Br07-Pb01-Br09 <sup>3</sup>               | 90.84(4)  | C00G-C00I-C00K              | 110.3(10) |
| Br09 <sup>3</sup> -Pb01-Br08 <sup>2</sup> | 93.09(4)  | C00E-C00J-C00L              | 115.2(11) |
| Br03-Pb02-Br06                            | 83.92(4)  | N00F-C00J-C00E              | 108.2(10) |
| Br03-Pb02-Br07 <sup>4</sup>               | 98.43(3)  | N00F-C00J-C00L              | 108.0(10) |
| Br03-Pb02-Br08                            | 172.85(4) | N00C-C00K-C00I              | 108.1(10) |
| Br03-Pb02-Br09                            | 91.13(4)  | C2-C00K-N00C                | 109.0(11) |
| Br05-Pb02-Br03                            | 86.96(3)  | C2-C00K-C00I                | 114.6(10) |
| Br05-Pb02-Br06                            | 87.79(4)  | C00M-C00L-C00J              | 113.6(11) |
| Br05-Pb02-Br07 <sup>4</sup>               | 172.03(4) | C00L-C00M-Br0B              | 111.0(10) |
| Br05-Pb02-Br08                            | 85.89(4)  | C00H-C1-N00D                | 110.6(10) |

<sup>1</sup>1+X,+Y,+Z; <sup>2</sup>1-X,1/2+Y,3/2-Z; <sup>3</sup>1+X,1+Y,+Z; <sup>4</sup>+X,-1+Y,+Z; <sup>5</sup>-1+X,+Y,+Z; <sup>6</sup>+X,1+Y,+Z; <sup>7</sup>1-X,-1/2+Y,3/2-Z; <sup>8</sup>-1+X,-1+Y,+Z

**Table S14.** Selected bond angles (°) for 2S.

| Atom-Atom-Atom                            | Angle (°)  | Atom-Atom-Atom              | Angle (°)  |
|-------------------------------------------|------------|-----------------------------|------------|
| Br03-Pb01-Br04                            | 84.89(7)   | Br08-Pb02-Br04 <sup>2</sup> | 176.64(7)  |
| Br03-Pb01-Br06                            | 89.18(8)   | Br08-Pb02-Br06 <sup>3</sup> | 91.90(9)   |
| Br03-Pb01-Br07                            | 169.00(8)  | Br08-Pb02-Br07 <sup>4</sup> | 105.09(8)  |
| Br03-Pb01-Br08 <sup>1</sup>               | 95.91(8)   | Br09-Pb02-Br04 <sup>2</sup> | 89.01(8)   |
| Br03-Pb01-Br09                            | 84.79(8)   | Br09-Pb02-Br06 <sup>3</sup> | 170.45(10) |
| Br04-Pb01-Br07                            | 84.37(7)   | Br09-Pb02-Br07 <sup>4</sup> | 95.29(8)   |
| Br04-Pb01-Br08 <sup>1</sup>               | 176.21(9)  | Br09-Pb02-Br08              | 88.38(9)   |
| Br04-Pb01-Br09                            | 90.08(8)   | Pb01-Br04-Pb02 <sup>5</sup> | 162.21(10) |
| Br06-Pb01-Br04                            | 92.38(8)   | Pb01-Br06-Pb02 <sup>6</sup> | 169.01(11) |
| Br06-Pb01-Br07                            | 88.86(8)   | Pb01-Br07-Pb02 <sup>7</sup> | 169.46(11) |
| Br06-Pb01-Br08 <sup>1</sup>               | 83.93(9)   | Pb02-Br08-Pb01 <sup>8</sup> | 156.97(10) |
| Br06-Pb01-Br09                            | 173.26(10) | Pb02-Br09-Pb01              | 165.72(11) |
| Br07-Pb01-Br08 <sup>1</sup>               | 94.65(8)   | C00F-C00E-C14               | 116(2)     |
| Br09-Pb01-Br07                            | 97.63(9)   | C00E-C00F-Br00              | 113(2)     |
| Br09-Pb01-Br08 <sup>1</sup>               | 93.68(8)   | N00D-C00G-C24               | 107(3)     |
| Br04 <sup>2</sup> -Pb02-Br06 <sup>3</sup> | 90.34(8)   | N00D-C00G-C2                | 109(3)     |

|                                           |           |               |           |
|-------------------------------------------|-----------|---------------|-----------|
| Br04 <sup>2</sup> -Pb02-Br07 <sup>4</sup> | 77.24(7)  | C24-C00G-C2   | 109(4)    |
| Br05-Pb02-Br04 <sup>2</sup>               | 83.16(7)  | N00C-C14-C00E | 107.1(16) |
| Br05-Pb02-Br06 <sup>3</sup>               | 83.58(8)  | N00C-C14-C22  | 109.1(18) |
| Br05-Pb02-Br07 <sup>4</sup>               | 160.23(8) | C00E-C14-C22  | 112(2)    |
| Br05-Pb02-Br08                            | 94.60(8)  | C1-C2-C00G    | 105(3)    |
| Br05-Pb02-Br09                            | 86.89(8)  | C2-C1-Br1     | 102(2)    |
| Br06 <sup>3</sup> -Pb02-Br07 <sup>4</sup> | 93.85(8)  | C3-C4-N1      | 106(3)    |

<sup>1</sup>+X,1+Y,+Z; <sup>2</sup>-1+X,+Y,+Z; <sup>3</sup>-1+X,-1+Y,+Z; <sup>4</sup>-X,-1/2+Y,1/2-Z; <sup>5</sup>1+X,+Y,+Z; <sup>6</sup>1+X,1+Y,+Z; <sup>7</sup>-X,1/2+Y,1/2-Z; <sup>8</sup>+X,-1+Y,+Z

**Table S15.** Summary of the band gap and chiroptical properties (CD/gCD) of reported Compound.

| Dimension                                                                                                                                 | Compound                                                                         | Band gap                     | CD (mdeg) / g <sub>CD</sub>           | Ref. |
|-------------------------------------------------------------------------------------------------------------------------------------------|----------------------------------------------------------------------------------|------------------------------|---------------------------------------|------|
| 1D                                                                                                                                        | ( <i>R/S</i> )-AMEPYPb <sub>2</sub> Br <sub>6</sub>                              | $E_g = 2.813$ eV             | $g_{CD} = 0.05$                       | 1    |
|                                                                                                                                           | ( <i>R/S</i> -3AD)PbBr <sub>3</sub> Cl·H <sub>2</sub> O                          | $E_g = 3.06$ eV              | $g_{CD} = 5.7 \times 10^{-3}$         | 2    |
| 2D                                                                                                                                        | ( <i>R/S</i> )-3BrMBA <sub>2</sub> PbBr <sub>4</sub>                             | $E_g = 3.09$ eV              | $g_{CD} = 1.08 \times 10^{-3}$        | 3    |
|                                                                                                                                           | ( <i>R/S</i> -β-MPA)EA <sub>2</sub> Pb <sub>2</sub> Br <sub>7</sub>              | $E_g = 2.75$ eV              | $g_{CD} = 4.6 \times 10^{-4}$         | 4    |
|                                                                                                                                           | ( <i>R/S</i> -MPEA) <sub>2</sub> MA <sub>2</sub> Pb <sub>3</sub> I <sub>10</sub> | $E_g = 2.05$ eV              | $g_{CD} = 8 \times 10^{-4}$           | 5    |
|                                                                                                                                           | CsPbBr <sub>3</sub> NPLs<br>( $n = 1 \sim 3$ )                                   | $n = 1, E_g = 3$ eV          | $n = 1, g_{CD} = 2.30 \times 10^{-3}$ | 6    |
|                                                                                                                                           |                                                                                  | $n = 2, E_g = 1.9$ eV        | $n = 2, g_{CD} = 6.67 \times 10^{-4}$ |      |
|                                                                                                                                           |                                                                                  | -                            | $n = 3, g_{CD} = 7.0 \times 10^{-5}$  |      |
|                                                                                                                                           | (R/S)MA-PNS/PAN<br>( $n = 2 \sim 5$ )                                            | $n = 2, E_g \approx 2.82$ eV | $n = 2, CD \approx 16.5$ mdeg         | 7    |
|                                                                                                                                           |                                                                                  | $n = 3, E_g \approx 2.70$ eV | $n = 3, CD \approx 6.5$ mdeg          |      |
| $n = 4, E_g \approx 2.61$ eV                                                                                                              |                                                                                  | $n = 4, CD \approx 4.5$ mdeg |                                       |      |
| -                                                                                                                                         |                                                                                  | $n = 5, CD \approx 0.5$ mdeg |                                       |      |
| (R/S-NEA) <sub>2</sub> (MA) <sub><math>n-1</math></sub> Pb <sub><math>n</math></sub> I <sub><math>3n+1</math></sub><br>( $n = 1 \sim 5$ ) | $E_g \approx 2.46$ eV~2.61 eV                                                    | $n = 1, CD \approx 244$ mdeg | 8                                     |      |
|                                                                                                                                           |                                                                                  | $n = 2, CD \approx 98$ mdeg  |                                       |      |
|                                                                                                                                           |                                                                                  | $n = 3, CD \approx 40$ mdeg  |                                       |      |
|                                                                                                                                           |                                                                                  | $n = 4, CD \approx 20$ mdeg  |                                       |      |
|                                                                                                                                           |                                                                                  | $n = 5, CD < 5$ mdeg         |                                       |      |

AMEPY = 2-aminoethyl-1-methylpyrrolidine

3AD = 3-aminopiperidine dihydrochloride

3BrMBA = 1-(3-bromphen-yl)-ethylamine

MPA = methylphenethylammonium and EA = ethylammonium

MPEA = methylphenylethylammonium; MA = methylammonium

NEA = 1-(2-naphthyl)ethylamine

**Table S16.** The asymmetry factor of various reported CPL detectors.

| Compound                                                                        | Asymmetry factor | Ref.      |
|---------------------------------------------------------------------------------|------------------|-----------|
| ( <i>S/R</i> -PEA)PbI <sub>3</sub>                                              | 0.08             | 9         |
| ( <i>S</i> -C <sub>5</sub> H <sub>14</sub> N)PbI <sub>3</sub>                   | 0.23             | 10        |
| [( <i>R</i> )-β-MPA] <sub>2</sub> PbCl <sub>4</sub>                             | 0.1              | 11        |
| ( <i>R</i> -BPEA) <sub>2</sub> PbI <sub>4</sub>                                 | 0.13             | 12        |
| ( <i>S</i> -VPEA) <sub>2</sub> PbI <sub>4</sub>                                 | 0.22             | 13        |
| [( <i>R</i> )-β-MPA]EAPbBr <sub>4</sub>                                         | 0.19             | 14        |
| ( <i>R</i> -MBA) <sub>2</sub> PbI <sub>4</sub>                                  | 0.24             | 15        |
| ( <i>S</i> -MBA) <sub>2</sub> PbI <sub>4</sub>                                  | 0.209            | 16        |
| ( <i>S</i> -2F-MBA) <sub>2</sub> PbI <sub>4</sub>                               | 0.288            | 16        |
| [( <i>R</i> )-β-MPA] <sub>2</sub> MAPb <sub>2</sub> I <sub>7</sub>              | 0.2              | 17        |
| ( <i>S</i> -NEA) <sub>2</sub> MAPb <sub>2</sub> I <sub>7</sub>                  | 0.15             | 8         |
| ( <i>R</i> -BrBA) <sub>2</sub> EA <sub>2</sub> Pb <sub>3</sub> Br <sub>10</sub> | 0.278            | This work |

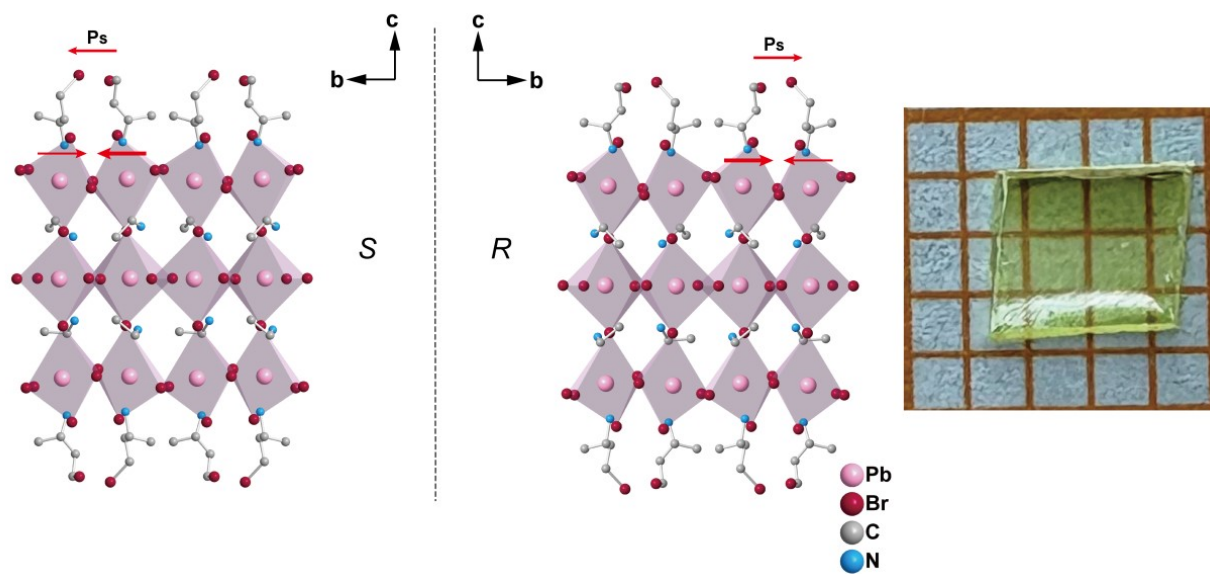

**Figure S1.** Chiral multilayered structures of 3R/S viewed along the  $a$ -axis, and the picture of crystal 3R. (Corresponding hydrogen atoms of organic cations are omitted for clarity.)

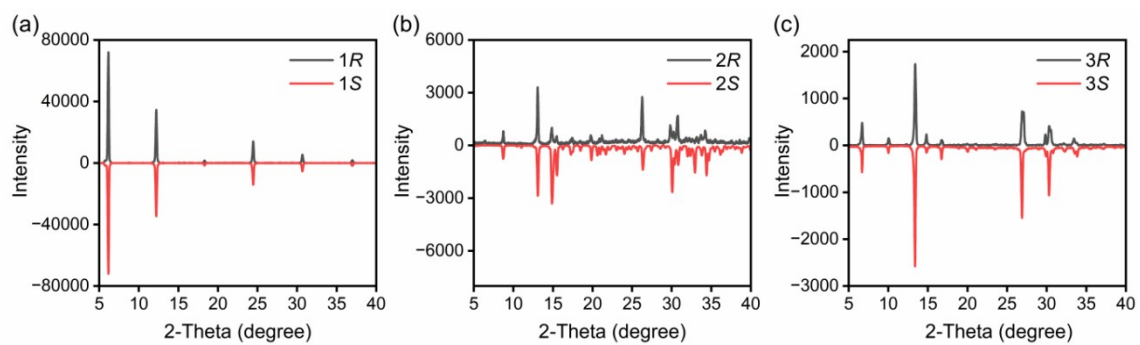

**Figure S2.** The powder XRD patterns of 1R/S, 2R/S, and 3R/S.

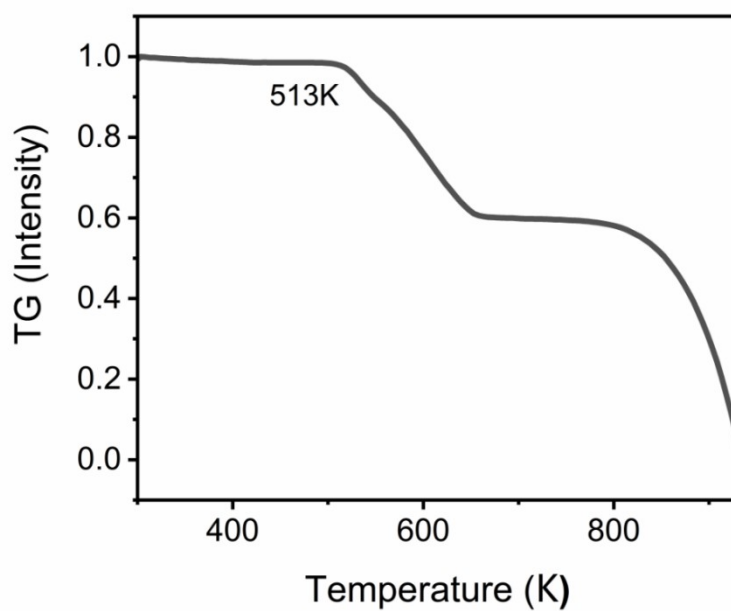

**Figure S3.** Thermogravimetric analysis curves for 3R.

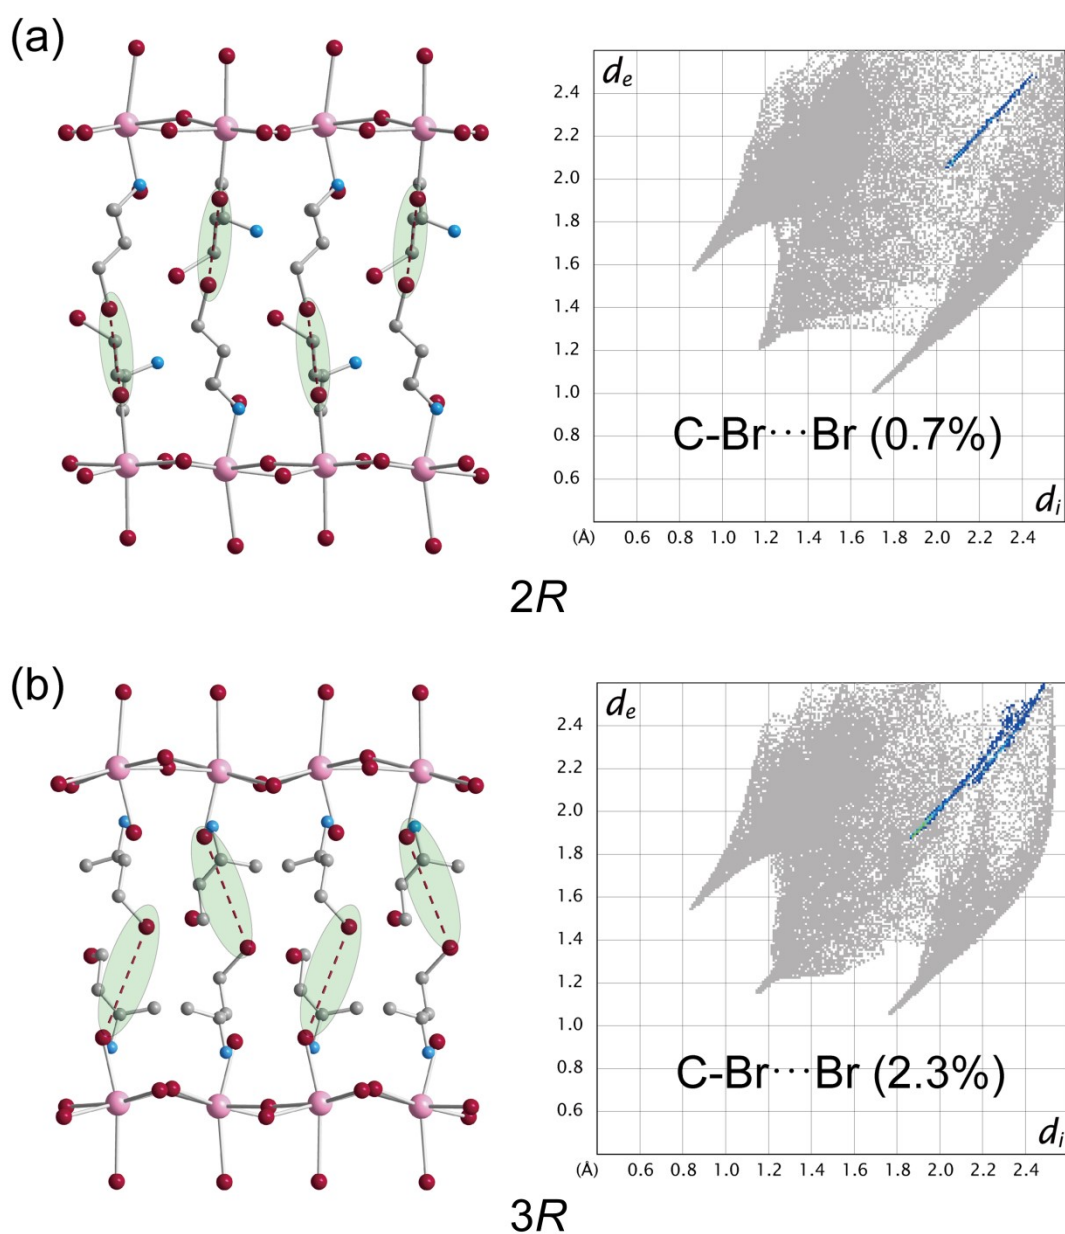

**Figure S4.** (a) Schematic diagram of the Br...Br bond and fingerprints expressing the strength of the Br...Br bond for 2R. (b) Schematic diagram of the Br...Br bond and fingerprints expressing the strength of the Br...Br bond for 3R.

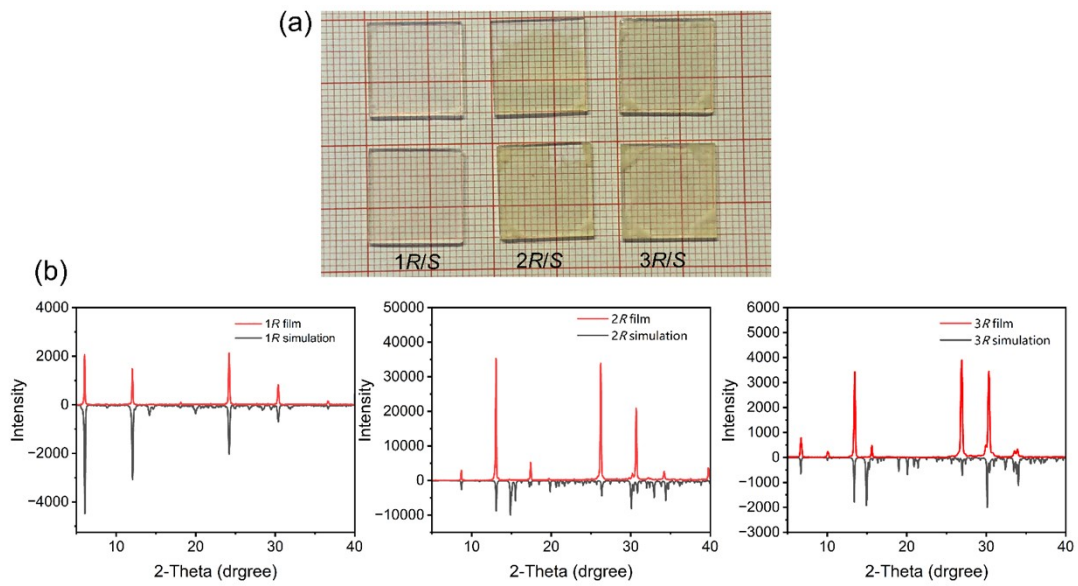

**Figure S5.** (a) The photo of the films for 1R/S, 2R/S and 3R/S; (b) The PXRD comparison diagram of the diaphragm of 1R/S, 2R/S and 3R/S and the theoretical simulation.

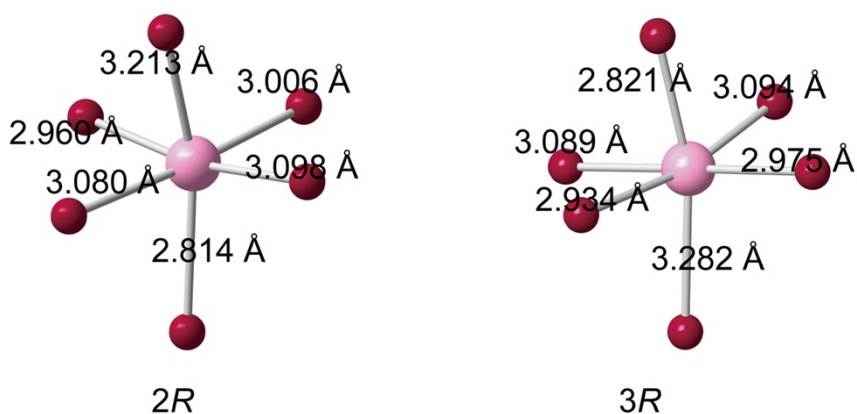

**Figure S6.**  $[\text{PbBr}_6]^{4-}$  octahedron for 2R and 3R. Using the formula  $\Delta d_{2R}$  is 0.0017 and  $\Delta d_{3R}$  is 0.0023.

$$\Delta d = \frac{1}{6} \sum_{i=1}^6 \left[ \frac{d_i - d}{d} \right]^2$$

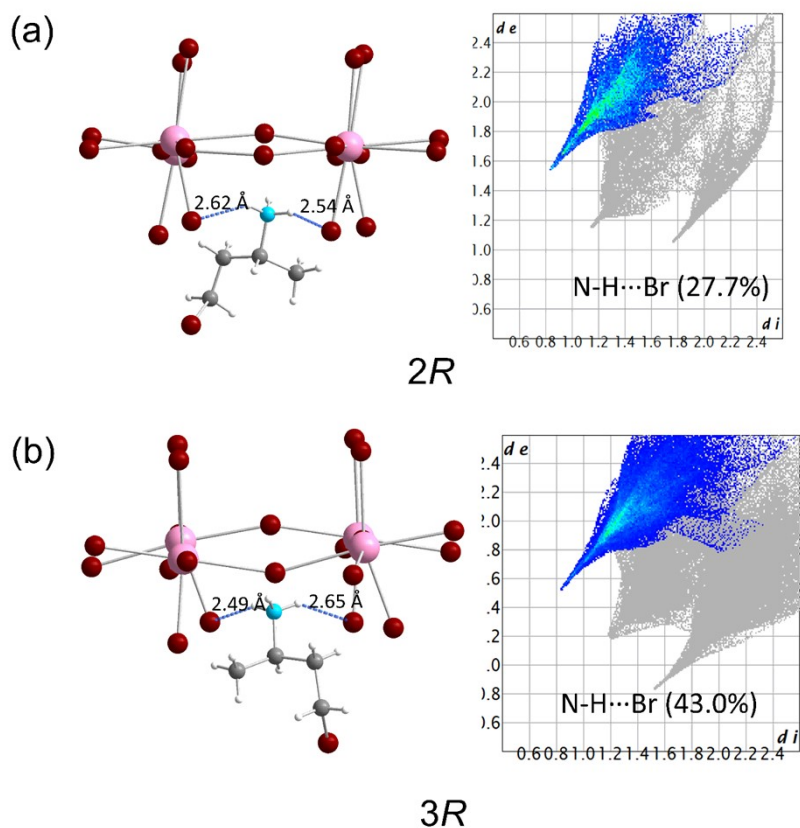

**Figure S7.** (a) Length of the N-H...Br bond and fingerprints expressing the strength of the N-H...Br bond for 2R. (b) Length of the N-H...Br bond and fingerprints expressing the strength of the N-H...Br bond for 3R.

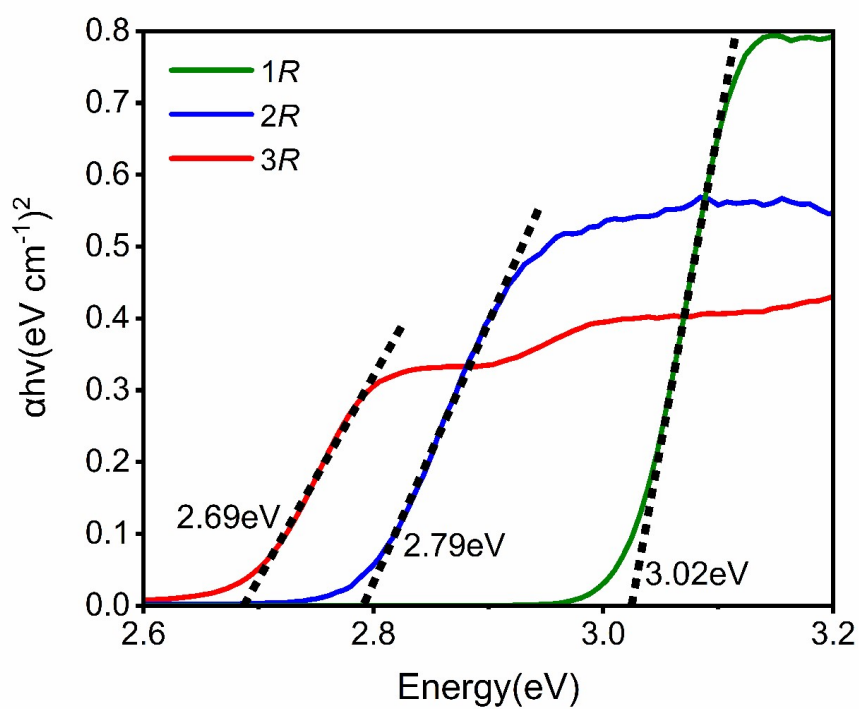

**Figure S8.** Bandgap calculated via Tauc for 1R, 2R and 3R.

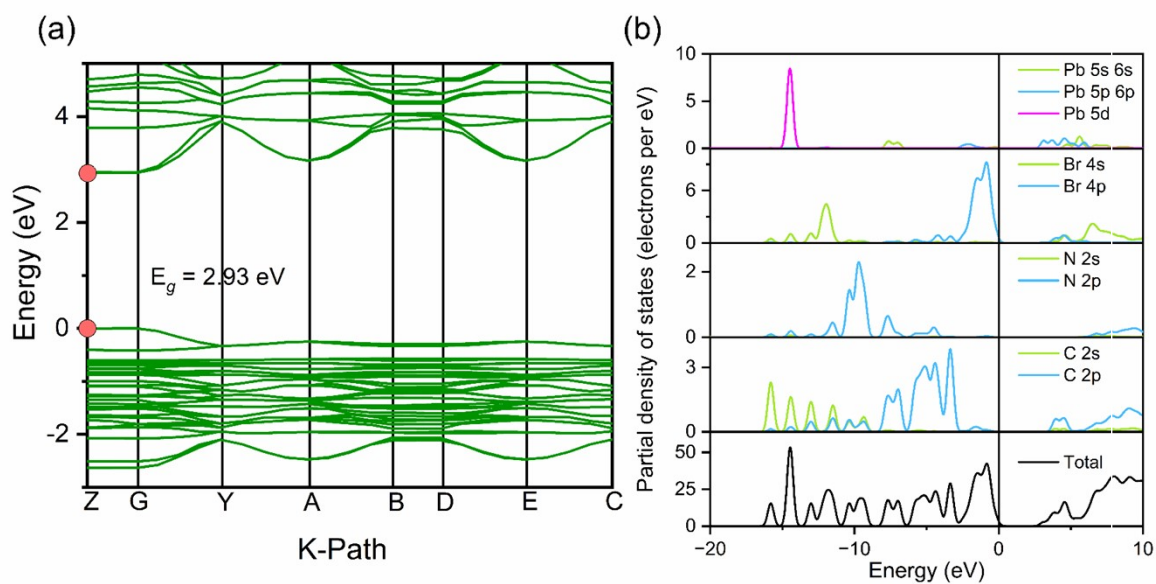

**Figure S9.** Calculated electronic band structures (a) and partial DOS (b) of 1R.

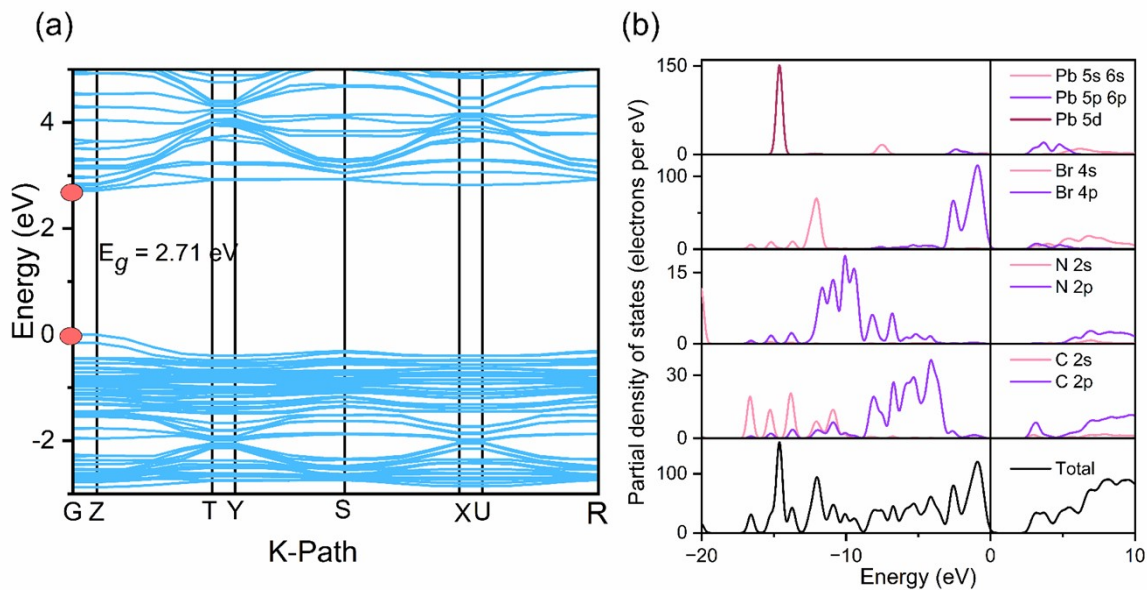

**Figure S10.** Calculated electronic band structures (a) and partial DOS (b) of 2R.

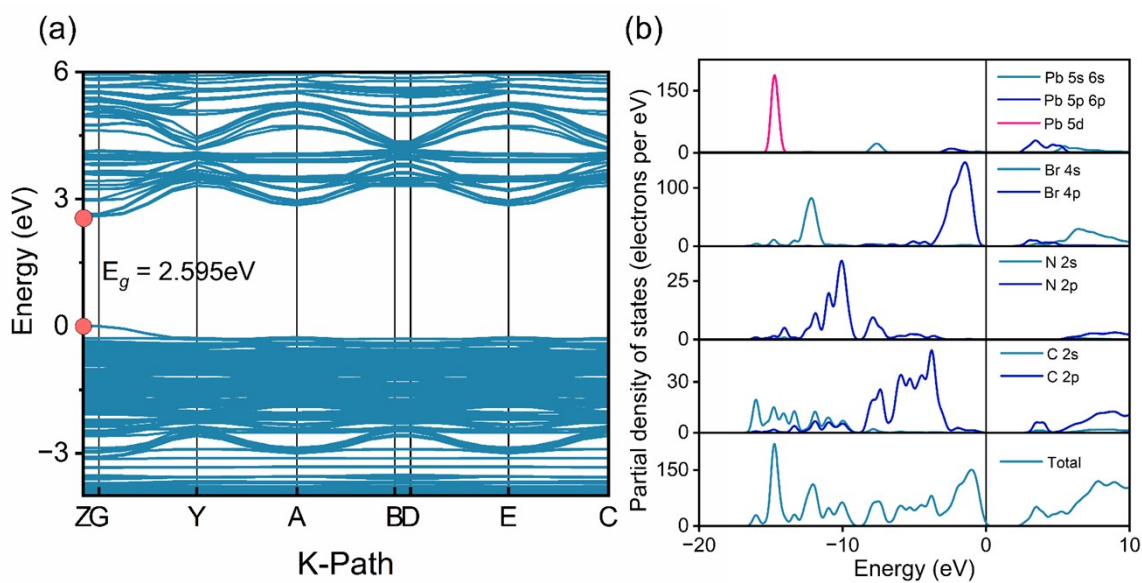

**Figure S11.** Calculated electronic band structures (a) and partial DOS (b) of 3R.

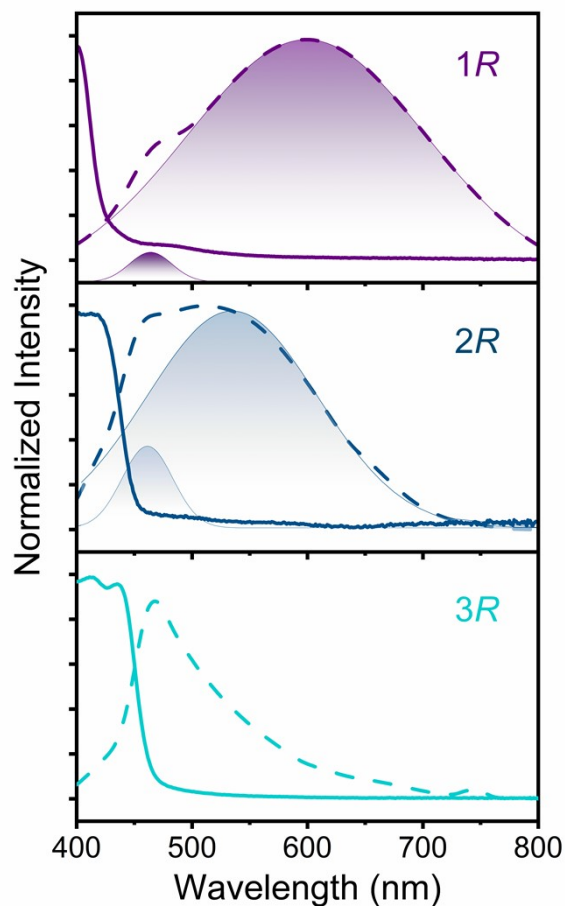

**Figure S12.** Absorption spectra (solid lines) and PL spectra (dashed lines) for 1R, 2R, and 3R. The PL spectra (dashed lines) are deconvoluted into multiple Gaussian components (filled colored areas)

For RP-phase perovskites with  $n = 1$  (1R), the inorganic layers are completely isolated by organic cations, forming a highly confined two-dimensional structure that results in exciton binding energies significantly higher than room-temperature thermal kinetic energy. The lattice's "softness" and anisotropy markedly enhance exciton-phonon coupling, where exciton-lattice interactions induce localized lattice distortions leading to self-trapped excitons (STE). Consequently, 1R samples exhibit luminescence behavior dominated by STE recombination, characterized by broad emission peaks (half-width at half maximum > 100 nm) and substantial Stokes shifts corresponding to the low-energy broad peak at 590 nm in the photoluminescence spectrum. Concurrently, weak free exciton (FE) emission is detectable at 462 nm. When the number of layers increases to  $n = 2$  (2R), the inorganic layer thickness increases, the quantum confinement effect weakens, the exciton binding energy decreases, lattice rigidity strengthens, and the exciton-phonon coupling strength diminishes, leading to reduced stability of STE. Consequently, 2R samples exhibit a transition from STE to band-edge FE emission: a distinct FE emission peak appears at

464 nm, while a STE broad peak persists at 530 nm. For samples with  $n = 3$  (3R), the quantum confinement effect further diminishes, with the electronic structure approaching that of three-dimensional perovskites. The exciton binding energy decreases, and lattice rigidity increases significantly, effectively suppressing the formation of self-bound states. At this stage, the luminescence mechanism is predominantly driven by band-edge FE recombination, exhibiting a sharp, narrow linewidth emission peak at 469 nm in the spectrum, while no distinct STE emission signals are observed in the low-energy region.

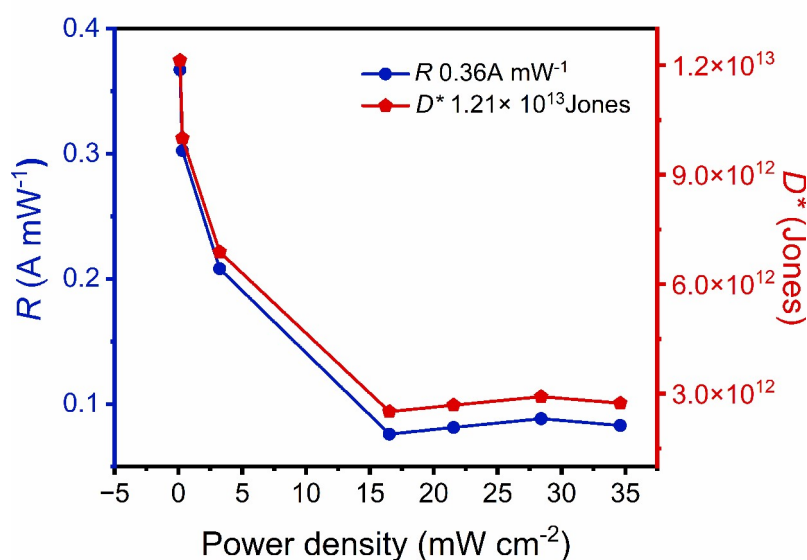

**Figure S13.** The responsivity ( $R$ ) and detectivity ( $D^*$ ) of the 3R device.

$$R = \frac{I_{photo} - I_{dark}}{PS}$$

$$D^* = \frac{R}{\sqrt{2qI_{dark}/S}}$$

where  $I_{photo}$ ,  $I_{dark}$ ,  $P$ ,  $S$ , and  $q$  represent the photocurrent, dark current, light power density, effective area, and charge constant, respectively.

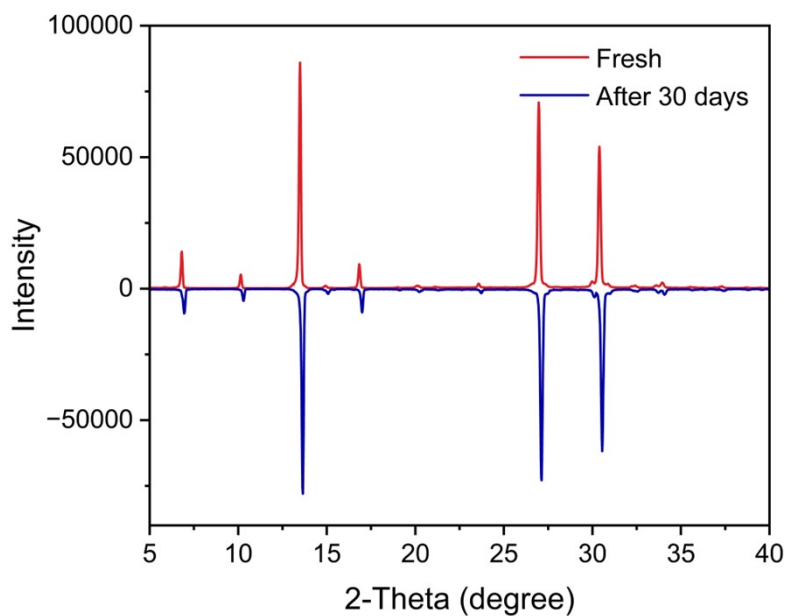

**Figure S14.** The XRD of 3R was measured on the fresh powder and after 30 days.

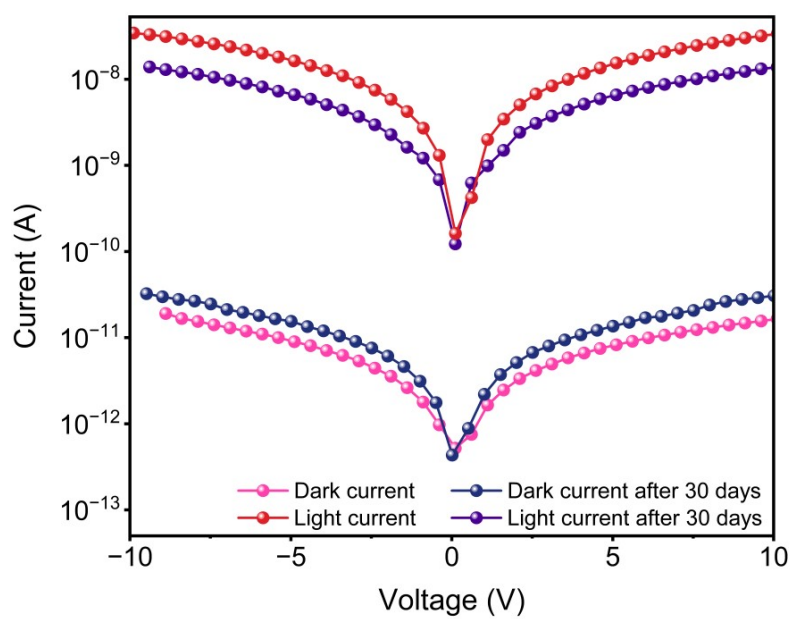

**Figure S15.** The I-V curves of 3R were measured on the fresh sample and after 30 days.

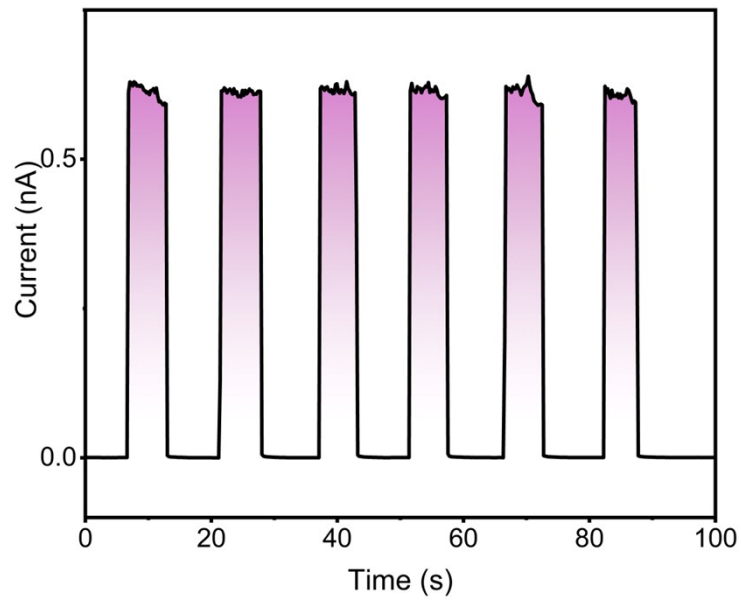

**Figure S16.** The real-time-dependent reproducible photovoltage for 3R.

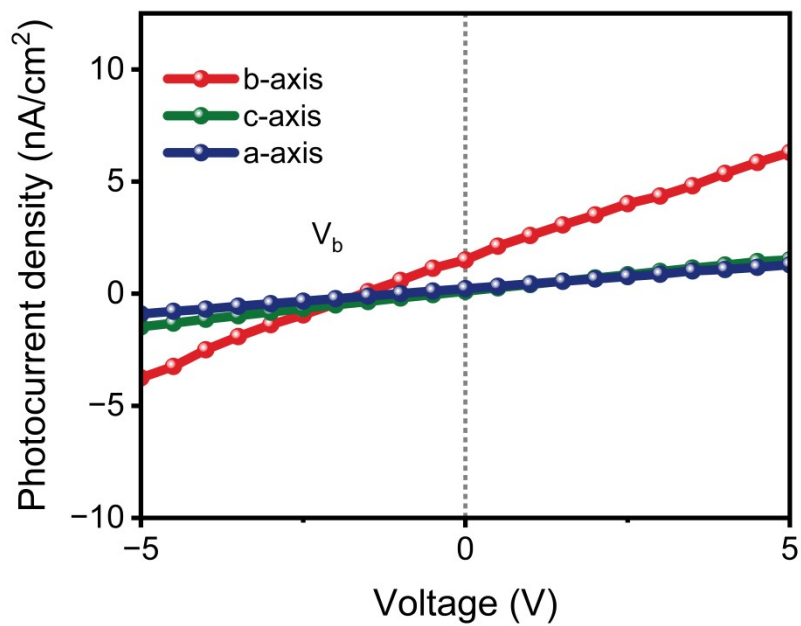

**Figure S17.** The intrinsic bulk photovoltaic effect measured along the *b*-axis for 3R.

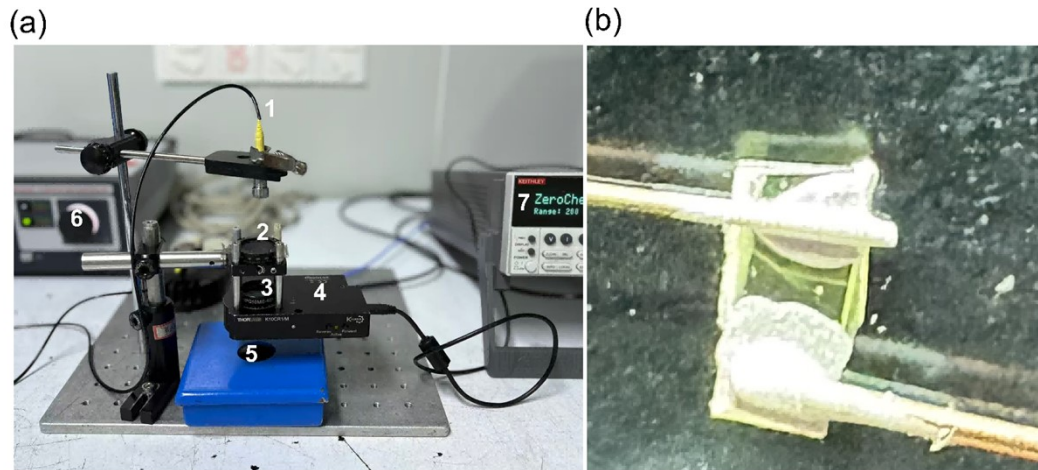

**Figure S18.** The photos of the single-crystal sample and the device for the CPL detection.

- 1: Fiber output laser head (Thorlabs LP405-MF300,405 nm)
- 2: Optical lens
- 3: 405 nm fiber collimator (Thorlabs MPQ10ME-405)
- 4: Electric rotary stage (Thorlabs K10CR1/M)
- 5: Electrode box with built-in single-crystal electrode
- 6: Desktop laser diode driver/TEC controller (ITC40017)
- 7: Electrostatic meter (Model 6517B)

## References.

- 1 H. Zheng, Z. Wu, J. Shao, J. Lan, Y. Liu, H. Xiong, J. Fan and W. Li, *Adv. Funct. Mater.*, 2025, e13402.
- 2 M. Su, X. Wu, J. Zhang, M. Wang, J. Ma, L. Lian, C. Dun, Q. Zeng, Q. Liu, Y. Tian, X. Chen, M. Jia, Y. Liu, Y. Han, Z. Ma, D. Wu, X. Li and Z. Shi, *Small Methods*, 2026, **10**, e02219.
- 3 D. Hu, Z. Zhang, K. Zhang, Q. He and W. Zhao, *J. Semicond.*, 2025, **46**, 72102.
- 4 W. Wu, X. Shang, Z. Xu, H. Ye, Y. Yao, X. Chen, M. Hong, J. Luo and L. Li, *Adv. Sci.*, 2023, **10**, 2206070.
- 5 S. Ramakrishnan, Y. Dong, Y. Xie, J. L. Shelton, M. P. Hautzinger, D. Nguyen Minh, M. Taddei, X. Zhang, Y. Zhang, D. B. Mitzi, M. A. Haque, J. L. Blackburn, Q. Yu, M. C. Beard and J. M. Luther, *J. Am. Chem. Soc.*, 2025, **147**, 44457–44467.
- 6 Q. Cao, R. Song, C. C. S. Chan, Z. Wang, P. Y. Wong, K. S. Wong, V. Blum and H. Lu, *Adv. Opt. Mater.*, 2023, **11**, 2203125.
- 7 Z. Wen, R. Lu, F. Gu, K. Zheng, L. Zhang, H. Jin, Y. Chen, S. Wang and S. Pan, *Adv. Funct. Mater.*, 2023, **33**, 2212095.
- 8 T. Liu, W. Shi, W. Tang, Z. Liu, B. C. Schroeder, O. Fenwick and M. J. Fuchter, *ACS Nano*, 2022, **16**, 2682–2689.
- 9 C. Chen, L. Gao, W. Gao, C. Ge, X. Du, Z. Li, Y. Yang, G. Niu and J. Tang, *Nat. Commun.*, 2019, **10**, 1927.
- 10 Y. Zhao, X. Li, J. Feng, J. Zhao, Y. Guo, M. Yuan, G. Chen, H. Gao, L. Jiang and Y. Wu, *Giant*, 2022, **9**, 100086.
- 11 X. Zhang, W. Weng, L. Li, H. Wu, Y. Yao, Z. Wang, X. Liu, W. Lin and J. Luo, *Small*, 2021, **17**, 2102884.
- 12 Y. Qin, F.-F. Gao, S. Qian, T.-M. Guo, Y.-J. Gong, Z.-G. Li, G.-D. Su, Y. Gao, W. Li, C. Jiang, P. Lu and X.-H. Bu, *ACS Nano*, 2022, **16**, 3221–3230.
- 13 Y. Zhao, X. Yin, Z. Gu, M. Yuan, J. Ma, T. Li, L. Jiang, Y. Wu and Y. Song, *Adv. Funct. Mater.*, 2023, **33**, 2306199.
- 14 W. Wu, X. Shang, Z. Xu, H. Ye, Y. Yao, X. Chen, M. Hong, J. Luo and L. Li, *Adv. Sci.*, 2023, **10**, 2206070.
- 15 Z. Liu, C. Zhang, X. Liu, A. Ren, Z. Zhou, C. Qiao, Y. Guan, Y. Fan, F. Hu and Y. S. Zhao, *Adv. Sci.*, 2021, **8**, 2102065.
- 16 J. Son, G. Jang, S. Ma, H. Lee, C. U. Lee, S. Yang, J. Lee, S. Moon, W. Jeong, J. H. Park, J. Kim, D. H. Kim, J. Park and J. Moon, *Adv. Funct. Mater.*, 2025, **35**, 2413041.
- 17 L. Wang, Y. Xue, M. Cui, Y. Huang, H. Xu, C. Qin, J. Yang, H. Dai and M. Yuan, *Angew. Chem. - Int. Ed.*, 2020, **59**, 6442–6450.
